1 **Design and assessment of TRAP-CSP fusion antigens as effective malaria**  
2 **vaccines**

3 Chafen Lu<sup>1¶</sup>, Gaojie Song<sup>1,3</sup>, Kristin Beale<sup>1</sup>, Jiabin Yan<sup>1</sup>, Emma Garst<sup>1</sup>, Emily Lund<sup>2</sup>, Flaminia  
4 Catteruccia<sup>2</sup> and Timothy A. Springer<sup>1¶</sup>

5 <sup>1</sup> Program in Cellular and Molecular Medicine, Boston Children's Hospital, Harvard Medical  
6 School,

7 <sup>2</sup> Department of Immunology and Infectious Diseases, Harvard T.H. Chan School of Public  
8 Health, Boston, MA 02115

9 <sup>3</sup> Current address: Shanghai Key Laboratory of Regulatory Biology, Institute of Biomedical  
10 Sciences and School of Life Sciences, East China Normal University, Shanghai, 200241, China.

11 ¶ Corresponding authors: [lu@crystal.harvard.edu](mailto:lu@crystal.harvard.edu), [Springer@crystal.harvard.edu](mailto:Springer@crystal.harvard.edu)

12 Running title: TRAP-CSP fusion antigens

## 13 **Abstract**

14           The circumsporozoite protein (CSP) and thrombospondin-related adhesion protein  
15 (TRAP) are major targets for pre-erythrocytic malaria vaccine development. However, the most  
16 advanced CSP-based vaccine RTS,S provides only partial protection, highlighting the need for  
17 innovative approaches for vaccine design and development. Here we design and characterize  
18 TRAP-CSP fusion antigens, and evaluate their immunogenicity and protection against malaria  
19 infection. TRAP N-terminal folded domains were fused to CSP C-terminal fragments consisting  
20 of the C-terminal  $\alpha$ TSR domain with or without the intervening repeat region. Homogenous,  
21 monomeric and properly folded fusion proteins were purified from mammalian transfectants.  
22 Notably, fusion improved expression of chimeras relative to the TRAP or CSP components  
23 alone. Immunization of BALB/c mice with the *P. berghei* TRAP-CSP fusion antigens formulated  
24 in AddaVax adjuvant elicited antigen-specific antibody responses. Remarkably, fusion antigens  
25 containing the CSP repeat region conferred complete sterile protection against *P. berghei*  
26 sporozoite challenge, and furthermore, mice that survived the challenge were completely  
27 protected from re-challenge 16 weeks after the first challenge. In contrast, fusion antigens  
28 lacking the CSP repeat region were less effective, indicating that the CSP repeat region  
29 provided enhanced protection, which correlated with higher antibody titers elicited by fusion  
30 antigens containing the CSP repeat region. In addition, we demonstrated that N-linked glycans  
31 had no significant effect on antibody elicitation or protection. Our results show that TRAP-CSP  
32 fusion antigens could be highly effective vaccine candidates. Our approach provides a platform  
33 for designing multi-antigen/multi-stage fusion antigens as next generation more effective malaria  
34 vaccines.

## 35 Introduction

36 Malaria remains a global health problem with an estimated 216 million cases of infection  
37 and 445,000 deaths worldwide in 2016. Children under age 5 are most vulnerable to malaria  
38 infection and suffer high mortality. The most advanced vaccine, RTS,S, reduced infection by  
39 27% in infants and 46% in children during the first 18 months, and protection declined thereafter  
40 [1, 2], leaving an unmet need for more effective vaccines.

41 Malaria is caused by *Plasmodium* parasites transmitted by *Anopheles* mosquitoes.  
42 Infected mosquitoes introduce salivary gland sporozoites into the host during a blood meal.  
43 Sporozoites infect hepatocytes, and subsequent infection of red blood cells causes the  
44 symptoms of malaria. Most vaccine development has targeted the pre-erythrocytic stage (liver  
45 stage infection). Both subunit vaccines and live sporozoites, attenuated by radiation or  
46 mutation, or given in combination with chemoprophylaxis, have been studied in preclinical and  
47 clinical trials. Although immunization with live sporozoites provides high levels of protection [3-  
48 6], the cost of manufacturing sporozoites from infected mosquitos, maintaining them viably, and  
49 the requirement for multiple intravenous injections have prevented wide applications in malaria  
50 endemic regions.

51 Two major proteins on the surface of sporozoites, the circumsporozoite protein (CSP)  
52 and thrombospondin-related adhesion protein (TRAP), are the focus of pre-erythrocytic subunit  
53 vaccine development; both are essential for sporozoite motility and liver-stage infection [7, 8].  
54 CSP, the most abundant surface protein in sporozoites, is composed of an N-terminal domain  
55 (NTD), Region I (RI), where CSP is cleaved during cell invasion [9, 10], a central repeat region,  
56 and the C-terminal  $\alpha$ TSR domain followed by a glycosylphosphatidylinositol (GPI) membrane  
57 anchor (Fig 1A). The RTS vaccine includes the C-terminal portion of the repeat region (R) and  
58 the  $\alpha$ TSR domain (T) from *P. falciparum* CSP (Fig 1A) fused to the hepatitis B surface antigen  
59 (S). TRAP consists of the N-terminal von Willebrand factor type-1 (VWA) or integrin I-domain,

60 the thrombospondin type-1 repeat (TSR) domain, C-terminal repeats, and transmembrane and  
61 cytoplasmic domains (Fig 1A). TRAP delivered by adenovirus prime and modified vaccinia  
62 Ankara virus (MVA) boost regimens achieved 40-95% protection efficacy in murine models [11,  
63 12], and 21% sterile protection in one phase I/II trial [13], and in another clinical trial reduced the  
64 risk of infection by 67% [14]. With the limited protective efficacy of the RTS,S vaccine and  
65 vaccines targeting TRAP in clinical trials, combination vaccination targeting both CSP and  
66 TRAP has recently been explored. Although a phase I/II clinical trial combining adjuvanted  
67 TRAP and RTS,S showed no benefit of protection from TRAP [15], a recent preclinical study  
68 showed that combining a modified RTS,S-like vaccine R21 with viral vectored TRAP  
69 significantly enhanced protective efficacy compared to single component vaccines [16].  
70 However, immunological interference has been a concern when combining two vaccines.  
71 Bauza et al. reported that co-administration of TRAP and CSP vaccines in one immunization  
72 regimen resulted in a reduction of CSP antibodies and no improvement of protection over either  
73 subunit vaccine alone [12]. In another study, CD8+ T cell interference was observed when  
74 combining viral vectored CSP with the blood stage antigen merozoite surface protein 1 (MSP1)  
75 [17]. Further work is needed to tailor and refine immunization regimens to achieve the additive  
76 benefit of CSP and TRAP co-vaccination.

77 **Figure 1. TRAP-CSP fusion antigen design and expression.** (A and B) Schematic  
78 diagrams. SP, signal peptide; TM, transmembrane domain; CTD, cytoplasmic domain;  
79 NTD, N-terminal domain; RI, region I; GPI, glycosylphosphatidylinositol membrane  
80 anchor. The region included in the RTS component of RTS,S vaccine is shown under  
81 the CSP diagram. The dashed line shows the fusion junction between TRAP and CSP.  
82 (C) and (D) Expression in 293T transfectants of *P. berghei* constructs (C) and *P.*  
83 *falciparum* constructs (D). Supernatants from 293T cells transiently transfected with the  
84 indicated constructs or vector alone (mock) were subjected to 10% reducing or

85 nonreducing SDS-PAGE and Western blot using antibodies to the His tag or the CSP  
86 repeat region as indicated.

87 Here we aimed to design TRAP-CSP fusion antigens to provide the benefit of protection  
88 conferred by delivering both antigens as a single protein. TRAP-CSP chimeric constructs  
89 containing functional protein domains and regions with protective B and T cell epitopes of both  
90 proteins were generated, and monomeric and properly folded chimeric proteins were purified  
91 from mammalian transfectants. Immunization with TRAP-CSP fusion antigens elicited strong  
92 antigen-specific antibody responses and sterile immunity against *P. berghei* challenge in mice.  
93 Our results show that TRAP-CSP fusion antigens offer promise as more effective vaccine  
94 candidates.

## 95 **Materials and methods**

### 96 **DNA constructs**

97 TRAP and CSP protein sequences are from *P. berghei* strain ANKA (GeneBank accession  
98 number AAB63302 for TRAP and CDS44911 for CSP) and from *P. falciparum* 3D7 (accession  
99 number AAA29775 for TRAP and CAB38998 for CSP). Synthetic cDNAs were codon optimized  
100 for mammalian expression by Atum Bio (Newark, CA) for *P. berghei* constructs and by  
101 GenScript (Piscataway, NJ) for *P. falciparum* constructs. *P. berghei* chimeras and TRAP-N  
102 constructs contain TRAP amino acids Gln<sup>25</sup>- Pro<sup>291</sup>, with amino acids 99-119  
103 (KRYGSTSKASLRFIIAQLQNN) replaced by the equivalent sequence from *P. falciparum*  
104 (HSDASKNKEKALIIKSLST,  $\alpha$ 2 and  $\alpha$ 3 helices in VWA domain structure) [18] due to  
105 unsuccessful expression of the native *Pb*TRAP sequence. *P. berghei* CSP fusion fragments  
106 contain CSP amino acids Asn<sup>164</sup>- Ser<sup>318</sup> and Pro<sup>239</sup>-Ser<sup>318</sup> for TRAP-N/CSP-RT and TRAP-  
107 N/CSP-T chimeras, respectively, with Asn<sup>280</sup> mutated to Ser to remove the putative N-  
108 glycosylation site. *P. falciparum* chimeras contain TRAP amino acids Arg<sup>26</sup>-Asp<sup>297</sup> with the  
109 nonconserved Cys<sup>55</sup> and the N-glycosylation site Asn<sup>132</sup> mutated to Ser and Gln, respectively,  
110 and CSP Gln<sup>96</sup>- Ser<sup>375</sup> and Asn<sup>207</sup>- Ser<sup>375</sup>, for the TRAP-N/CSP-JRT and TRAP-N/CSP-RT,  
111 respectively. *P. berghei* constructs were inserted in pLexM vector [18]. *P. falciparum* constructs  
112 were cloned into Nhe I-Bam HI sites of the pIRES2-EGFP vector (Takara Bio, formerly  
113 Clontech). All constructs contain a modified murine kappa chain secretion signal peptide and C-  
114 terminal His tag [18], and were confirmed by DNA sequencing.

### 115 **Antibodies**

116 Monoclonal antibodies to *P. falciparum* TRAP were generated and characterized as described  
117 in the Supplemental Methods and Figures. Antibodies 1G12, 4B3 and 4C2 to *P. falciparum* CSP  
118 were kindly provided by Dr. Nicholas J. MacDonald (NIH, Malaria Vaccine Development

119 Branch). 3D11 and 2A10 hybridoma lines were obtained from BEI Resources (ATCC), and IgG  
120 antibodies were purified from serum-free culture supernatants using protein G affinity  
121 chromatography. Secondary antibodies were rabbit polyclonal anti-His (Delta Biolabs),  
122 Horseradish peroxidase (HRP)-anti-rabbit and HRP-anti-mouse IgG (GE Healthcare) for  
123 Western blot, and HRP-penta-His antibody (Qiagen) and HRP-anti-mouse IgG (Abcam) for  
124 ELISA.

### 125 **Cell culture**

126 293T cells (ATCC) were cultured in DMEM medium supplemented with 10% fetal bovine serum  
127 (FBS). 293S GnTI- cells (obtained from Philip J. Reeves Laboratory, Departments of Biology  
128 and Chemistry, Massachusetts Institute of Technology ) [19] and Expi293F cells (Thermo Fisher  
129 Scientific) were cultured in suspension in serum-free Ex-Cell 293 medium (Sigma) and Expi293  
130 medium (Thermo Fisher Scientific), respectively.

### 131 **Protein expression and purification**

132 293T cells in 6-well tissue culture plates were transfected using Lipofectamine<sup>2000</sup> according to  
133 manufacturer's instruction (Thermo Fisher Scientific). For scaleup transient transfection of 293S  
134 GnTI- cells, suspension cultures were transfected using polyethyleneimine [20]. Culture  
135 supernatants were harvested 6 days later. For stable transfection of Expi293F cells, adherent  
136 Expi293F cells were transfected in DMEM medium with 10% FBS using Lipofectamine<sup>2000</sup>  
137 transfection. Selection was started 48 hours later by addition of 0.5 mg/ml G418 (final  
138 concentration). After 10-12 days, cells were harvested and sorted for top 5% GFP positive cells  
139 on a FACSAria machine (BD Biosciences). Cells were sorted a 2<sup>nd</sup> time to further enrich GFP  
140 expressing cells. Sorted cells were expanded in suspension culture in serum-free Expi293  
141 medium for protein purification. Proteins were purified from culture supernatants of  
142 transfectants by Ni-NTA followed by gel filtration chromatography as described [18]. For  
143 endoglycosidase H (Endo H) treatment, Ni-NTA purified materials were buffer exchanged to 50  
144 mM sodium acetate, pH 5.5, and 150 mM NaCl, and digested with Endo H at 1:20 mass ratio of

145 enzyme:protein at 4°C, overnight. Fractions from gel filtration chromatography were subjected  
146 to non-reducing SDS-PAGE and monomeric protein peak fractions were pooled and stored in  
147 aliquots at -80°C.

#### 148 **Western blot**

149 Cultural supernatants (10 µl) from transiently transfected 293T cells were mixed with 2.5 µl 5x  
150 Laemmli sample buffer containing 25% β-mercaptoethanol or 25 mM N-ethylmaleimide for  
151 reducing and non-reducing SDS-polyacrylamide gel electrophoresis (PAGE), respectively.  
152 Blotting to PVDF membrane was carried out using Tran-Blot Turbo transfer system (Bio-RAD).  
153 Membrane was probed with 0.4 µg/ml primary antibody, followed by incubation with HRP-  
154 conjugated 2<sup>nd</sup> antibodies and chemiluminescence imaging using LAS-4000 system (Fuji Film).  
155 ImageJ software was used for quantitation of protein bands.

#### 156 **Enzyme-linked immunosorbent assay (ELISA)**

157 96-well Elisa plates (Costar) were coated with 50 µl of purified antibodies at 5 µg/ml in 50 mM  
158 sodium carbonate buffer, pH 9.5, 50 µl/well for 2 hrs at 37°C, and blocked with 3% BSA for 90  
159 min at 37°C. His tagged TRAP or TRAP-CSP fusion proteins (50 µl, 0.4 µg/ml) was added and  
160 incubated at 4°C overnight. Binding was detected with HRP-anti-His (Penta-His Ab at 1:5000  
161 dilution) or with biotin-labeled primary antibody at 0.5 µg/ml followed by HRP-streptavidin. 10  
162 min after addition of peroxidase substrate (Life Technologies), plates were read at 405 nM on  
163 an Emax plate reader (Molecular Devices).

#### 164 **Immunization**

165 10 µg *P. berghei* TRAP/CSP fusion antigens diluted in 100 µl PBS was mixed with 100 µl  
166 AddaVax adjuvant (InvivoGen, San Diego), and completely emulsified by pushing the mixture  
167 between two glass syringes via a two-way valve. BALB/c mice (The Jackson Laboratory) were  
168 injected intraperitoneally (i.p) with 200 µl of antigen and adjuvant emulsion per mouse. Mice  
169 were immunized 3 times (prime + 2 boosts) at intervals of three weeks. Control mice received



170 PBS and adjuvant emulsion. Tail blood (50-100 $\mu$ l) was collected from each mouse for  
171 measuring antibody responses.

### 172 **Antibody titer measurement**

173 Serum was obtained from tail blood and stored at -80°C until use. 96-well ELISA plates were  
174 coated with 50 $\mu$ l of TRAP-N/CSP-RT or TRAP-N/CSP-T antigen at 2.5  $\mu$ g/ml in sodium  
175 carbonate buffer, pH 9.5, overnight at 4°C. Plates were blocked with 3% BSA. Sera were serially  
176 diluted 5-fold starting from 1:200, and 50  $\mu$ l/well added in duplicate and incubated for 2 hrs at  
177 room temperature. Similarly, positive control antibody 3D11 to the *P. berghei* CSP repeat region  
178 or antibody to the His tag at the C-terminus of the antigens were used at 1  $\mu$ g/ml. Serum from  
179 adjuvant alone immunized mice was diluted and added to each plate as negative control. After  
180 incubation with HRP-anti-mouse whole IgG, peroxidase substrate was added, and absorbance  
181 at 405 nm was read 10 min later. A semi-logarithmic dilution curve (x-axis: log dilution and y-  
182 axis: OD<sub>405</sub>, subtracted by the negative control) was generated for each serum sample, and a  
183 line parallel to the x axis was drawn at half of the OD value of the 3D11 or His tag positive  
184 control antibodies. Antibody titer was taken as the dilution factor where the dilution curve  
185 intercepted with the line at half of the OD value of the positive control.

### 186 ***P. berghei*-infected mosquitoes**

187 PbGFP<sub>CON</sub>, a recombinant *Plasmodium berghei* (ANKA strain) that constitutively expresses GFP  
188 was used [21]. To infect mosquitoes, PbGFP<sub>CON</sub>-infected mice (3-7% parasitemia) were  
189 anaesthetized and laid over a cage of female *Anopheles stephensi* mosquitoes (50-100  
190 mosquitoes per cage), which were allowed to feed for 15 min. Successful mosquito infection  
191 was confirmed 10 days after blood feeding by dissecting the midgut and examining under a  
192 fluorescent microscope for the presence of oocyst. At day 20 after blood feeding, infected  
193 mosquitoes (prevalence of infection >80%) were used for challenge.

### 194 **Challenge by infected mosquito bite**

195 For challenge infection by mosquito bite, immunized or naive mice were anaesthetized and

196 exposed to the bites of PbGFP<sub>CON</sub>-infected mosquitoes for 15 min as described above. Mice  
197 were monitored for blood stage infection at days 7, 9 and 12 post challenge by Giemsa staining  
198 of thin blood smears and microscopic examination, and parasitemia was determined as %  
199 infected red blood cells. Mice that remained blood stage parasite-free after 12 days were  
200 considered sterilely protected.

#### 201 **Ethics Statement**

202 Animal work was conducted in accordance with and was approved by the Harvard Medical  
203 School Institutional Animal Care and Use Committee (IACUC) under protocol #05010. Animals  
204 were cared in compliance with the U.S. Department of Agriculture (USDA) Animal Welfare Act  
205 (AWA) and the Public Health Service (PHS) Policy on Humane Care and Use of Laboratory  
206 Animals.

## 207 Results

### 208 Design of TRAP and CSP fusion antigens

209 TRAP and CSP fusion constructs combined functional domains defined in crystal  
210 structures and regions containing protective B and T-cell epitopes from both proteins (Fig 1B).  
211 The folded VWA and TSR domains at the N-terminus of TRAP [18] and the  $\alpha$ TSR domain at the  
212 C-terminus of CSP [22] were left intact in all fusion constructs, which varied in their content of  
213 CSP repeats in between the folded domains (Fig 1B). The VWA and TSR domains of TRAP are  
214 required for sporozoite motility and host cell invasion [7, 23]. Moreover, the VWA domain is the  
215 target of potent protective CD8+ T cell responses elicited by TRAP or whole sporozoite  
216 immunization [24-26]. The CSP repeat region contains immunodominant B-cell epitopes  
217 recognized by sporozoite neutralizing antibodies, whereas the  $\alpha$ TSR domain contains several T-  
218 cell epitopes associated with protection [26-30]. The junction (J) between the NTD and the  
219 repeat region, which is included in the TRAP-N/CSP-JRT construct and not in the RTS,S  
220 vaccine, has recently been identified to contain epitopes for potent protective antibodies [31-33].  
221 Fusion constructs from both *P. berghei* and *P. falciparum* were generated for evaluation of  
222 protein expression and folding. *P. berghei* fusion proteins contain 4 putative N-glycosylation  
223 sites in the TRAP fragment for comparison of glycosylated and N-glycan shaved versions,  
224 whereas the single N-glycosylation site in the *P. falciparum* chimeric constructs was removed by  
225 mutating TRAP Asn<sup>132</sup> to Gln.

226 **Figure 2. TRAP-CSP fusion protein purification.** (A) *P. berghei* chimeras were  
227 produced by transient transfection of 293S GnTI<sup>-</sup> cells, purified by Ni-NTA affinity  
228 chromatography, treated with or without Endo H, and subjected to reducing SDS-PAGE  
229 and Coomassie blue staining. Arrows point to glycosylated (glyco) and Endo H-treated  
230 (dNG) chimera and Endo H protein bands. Dotted lines separate lanes run on the same  
231 gel and moved. (B) Representative Superdex 200 10/300 GL column purification

232 chromatogram, shown TRAP-N/CSP-T sample that had previously been purified by Ni-  
233 NTA and treated with Endo H. Insert, nonreducing SDS-PAGE of monomer peak  
234 fractions. (C) Nonreducing SDS-PAGE and Coomassie blue staining of *P. berghei* fusion  
235 proteins after the Superdex S200 purification step. (dNG) denotes Endo H treatment.  
236 Dotted lines divide lanes run on two identical gels and moved. (D) SDS-PAGE and  
237 Coomassie blue staining of purified *P. falciparum* TRAP-N/CSP-JRT and TRAP-N/CSP-  
238 RT fusion proteins run under nonreducing and reducing conditions.

### 239 **Expression, purification and folding state of TRAP-CSP fusion proteins**

240 Expression of fusion proteins or fragments of TRAP and CSP alone were tested in  
241 mammalian 293 cell transfectants, which were previously used to obtain well-folded,  
242 glycosylated *P. falciparum* and *P. vivax* TRAP N-terminal fragments and CSP C-terminal  
243 fragments for structure and carbohydrate determination [18, 22, 34]. Equal amounts of culture  
244 supernatants from transiently transfected 293 cells were subjected to Western blot using  
245 antibodies to the C-terminal His-tag or to the CSP repeat region. TRAP-N protein from both *P.*  
246 *berghei* and *P. falciparum* was detected by anti-His, and migrated faster under non-reducing  
247 than reducing conditions, as typical of proteins with disulfide bonds (Fig 1C, lanes 2 and 7 and  
248 1D, lanes 2 and 8). Lower amount of *P. berghei* CSP-RT fragment was observed (Fig 1C, lanes  
249 5 and 10), whereas *P. falciparum* CSP-JRT and CSP-RT fragments were undetectable by anti-  
250 His (Fig 1D, top, lane 4 and 6, and lanes 10 and 12). However, a weak *P. falciparum* CSP-RT  
251 band of ~27 kD was detected by repeat region antibody 2A10 under reducing condition (Fig 1D,  
252 bottom, lane 6). In contrast to TRAP and CSP fragments alone, larger amounts of TRAP-CSP  
253 fusion proteins of both *P. berghei* and *P. falciparum* were detected by the His tag antibody and  
254 had the expected sizes (Fig 1C top, lanes 8 and 9 vs 7; Fig 1D top, lane 9 and 11 vs 8);  
255 quantification of protein bands under non-reducing showed 5- and 3- fold increases of *Pb*TRAP-  
256 N/CSP-RT and *Pb*TRAP-N/CSP-T, respectively, relative to *Pb*TRAP-N protein, and 3- and 2-  
257 fold increases of *Pf*TRAP-N/CSP-JRT and *Pf*TRAP-N/CSP-RT, respectively, relative to

258 *Pf*TRAP-N. Additionally, the chimeras containing the CSP repeat region were recognized by  
259 CSP repeat region antibodies (Fig 1C and 1D, bottom). Thus, fusion improved expression of the  
260 chimeric proteins relative to the TRAP or CSP components alone.

261 TRAP-CSP fusion proteins were purified for further characterization. *P. berghei* fusion  
262 constructs, TRAP-N/CSP-RT and TRAP-N/CSP-T, containing 4 putative N-glycosylation sites,  
263 were expressed in 293S GnTI- cells, which lack N-acetylglucosaminyltransferase I (GnTI) and  
264 produce glycoproteins with short and homogeneous high mannose-type N-linked glycans that  
265 can be removed by endoglycosidase H (Endo H) [19], and purified by Ni-NTA affinity  
266 chromatography and treated with Endo H. Endo H removed ~6 kD mass from each of the *P.*  
267 *berghei* TRAP-N/CSP-RT and TRAP-N/CSP-T proteins and reduced their mass to 52 kD and 41  
268 kD, respectively (Fig 2A, reducing SDS-PAGE). A second purification step, gel filtration  
269 chromatography, was utilized to obtain homogenous and monomeric proteins. A representative  
270 chromatogram is shown in Fig 2B. The purified *P. berghei* TRAP-N/CSP-RT and TRAP-N/CSP-  
271 T chimeras and their respective N-glycan shaved versions (designated dNG) each showed a  
272 single band by non-reducing SDS-PAGE (Fig 2C), confirming homogeneity and monomeric  
273 state. The *P. falciparum* TRAP-N/CSP-JRT and TRAP-N/CSP-RT fusion proteins, with the  
274 single N-glycosylation site mutated, were purified from Expi293F stable transfectants, and  
275 monomeric proteins showed mass of ~75 kD and 58 kD, respectively, under reducing condition  
276 (Fig 2D).

277 Proper folding of recombinant antigens is required to elicit B cell responses to native  
278 proteins on parasites. Purification of monomeric well-behaved material already suggested that  
279 the fusion proteins were well folded. We utilized available, well-characterized monoclonal  
280 antibodies (mAbs) to *P. falciparum* TRAP and CSP to further probe the folding state of TRAP-  
281 CSP fusion proteins. We generated and characterized a panel of mAbs to *Pf*TRAP  
282 (Supplemental Material). CL2/1 and CL5/27 mAbs to *Pf*TRAP VWA domain and CL5/22,  
283 CL5/42, CL5/46 and CL5/54 mAbs to the TSR domain and  $\beta$ -ribbon (Fig s1) recognized TRAP

284 on the surface of transfectants (Fig s2, Table s1) and stained unfixed *P. falciparum* sporozoites  
285 (Fig s3, Table s1), suggesting that they recognize native epitopes. Furthermore, the epitopes of  
286 mAbs CL2/1, CL5/27, CL5/22, CL5/46 and CL5/54 are sensitive to disulfide reduction (Fig s5).  
287 The 4B3, 4C2 and 1G12 mAbs to the  $\alpha$ TSR domain of PfCSP have been shown to recognize  
288 CSP with intact disulfides and inhibit sporozoite invasion of liver cells *in vitro* [35]. The purified,  
289 monomeric *P. falciparum* TRAP-N/CSP-JRT and TRAP-N/CSP-RT fusion proteins bound to the  
290 VWA domain mAbs CL2/1 and CL5/27 and mAbs CL5/22, CL5/42, CL5/46 and CL5/54 to the  
291 TSR domain and  $\beta$ -ribbon at levels comparable to the TRAP-N alone (Fig 3A). Furthermore, the  
292 two fusion proteins reacted with the  $\alpha$ TSR domain mAbs 4B3, 4C2 and 1G12 to a level  
293 comparable to the His tag antibody and the repeat region antibody 2A10 (Fig 3B). These results  
294 indicate that the TRAP VWA and TSR domains and the CSP  $\alpha$ TSR domain of the fusion  
295 proteins are correctly folded.

296 **Figure 3. Reactivity of fusion proteins to antibodies that recognize correctly**  
297 **folded TRAP and CSP.** ELISA plates were coated with the indicated antibodies and  
298 incubated with purified *P. falciparum* TRAP-CSP fusion proteins or TRAP-N alone as  
299 indicated. Binding to the immobilized antibodies was detected by HRP-penta-His  
300 antibody to the C-terminal His tag (A) or biotin-labeled TRAP antibody CL5/42 followed  
301 by HRP-streptavidin (B). Results are mean  $\pm$  SD of triplicate wells, and representative  
302 of 3 independent experiments.

303 These results show that TRAP-CSP chimeras are well expressed in mammalian cells,  
304 are properly folded, and yielded homogenous, monomeric proteins after Ni-NTA and gel  
305 filtration chromatography.

306

307 **Humoral responses elicited by TRAP-CSP fusion antigens**

308 Mice were immunized with *P. berghei* TRAP-N/CSP-T and TRAP-N/CSP-RT fusion  
309 antigens to evaluate immunogenicity and protection against *P. berghei* infection. To investigate  
310 the effect of the high mannose N-linked glycans on these chimeras, mice were also immunized  
311 with the Endo H-shaved versions, TRAP-N/CSP-RT (dNG) and TRAP-N/CSP-T (dNG), in which  
312 all but one N-acetylglucosamine residue was removed. Fusion antigens were formulated in  
313 AddaVax, a squalene-based oil-in-water emulsion. BALB/c mice were primed with 10 µg  
314 adjuvanted antigen, followed by two boost immunizations. Sera were collected at weeks 6, 16  
315 and 32 post antigen priming to determine antibody responses. Antigen-specific IgG antibody  
316 titers, defined as serum dilutions giving half of the absorbance of a positive control antibody, were  
317 measured by ELISA.

318 Whether the chimeras contained high-mannose or shaved N-glycans had little effect on  
319 antibody responses. Serum IgG antibody titers from the TRAP-N/CSP-RT immunized group  
320 were comparable to the TRAP-N/CSP-RT (dNG) antigen group, at all three time points (Fig 4A).  
321 Similarly, no significant differences in antibody titers were observed between the TRAP-N/CSP-  
322 T and TRAP-N/CSP-T (dNG) groups (Fig 4A and 4B). The results showed that the four putative  
323 high mannose type N-linked glycans in the TRAP-N fragment neither enhanced nor  
324 compromised antigen-specific antibody responses.

325 **Figure 4. Antibody responses elicited by immunization with *P. berghei* TRAP-CSP**  
326 **fusion antigens.** BALB/c mice were immunized with TRAP-N/CSP-RT and TRAP-N/CSP-  
327 T antigens and their respective N-glycan shaved versions (dNG) in AddaVax adjuvant. Tail  
328 blood was collected at the indicated time points post antigen priming and antigen specific  
329 IgG antibody titers were measured by ELISA. Antibody titers of individual mice were  
330 measured against the TRAP-N/CSP-RT antigen (A) and the TRAP-N/CSP-T antigen (B).  
331 Mean and SD are shown, and analyzed by One-way ANOVA with Sidak's multiple  
332 comparisons test (GraphPad Prism 7). \*, P<0.05; \*\*, P<0.01; ns, not significant.

333 In contrast, the CSP repeats present in TRAP-N/CSP-RT compared to TRAP-N/CSP-T  
334 significantly enhanced antibody responses. As shown in Fig 4A, when antibody titers were  
335 measured against the TRAP-N/CSP-RT protein containing the repeat region, mice immunized  
336 with TRAP-N/CSP-RT and TRAP-N/CSP-RT (dNG) had ~2-fold higher titers than mice  
337 immunized with the TRAP-N/CSP-T and TRAP-N/CSP-T (dNG) antigens, 6 weeks and 16  
338 weeks post priming (Fig 4A). By comparison, antibody titers against the TRAP-N/CSP-T protein  
339 lacking the repeat region were comparable among the four groups of mice (Fig 4B).

340

#### 341 **Protection against *P. berghei* infection**

342 Protection of immunized mice against *P. berghei* infection was assessed. Mice were  
343 challenged by bite with *P. berghei* infected *Anopheles stephensi* mosquitoes. Blood stage  
344 infection was monitored at days 7, 9 and 12 post challenge. Remarkably, 5 out of 5 mice  
345 immunized with TRAP-N/CSP-RT and TRAP-N/CSP-RT (dNG) antigens were completely free of  
346 blood stage parasites day 12 after challenge (100% sterile protection) (Table I). In contrast, the  
347 TRAP-N/CSP-T and TRAP-N/CSP-T (dNG) antigens each conferred 40% sterile protection; 3 of  
348 5 challenged mice in each immunized group showed blood stage infection at each of days 7, 9,  
349 and 12 after challenge (Table I).



350 **Table I. Protection against *P. berghei* challenge**

| <i>P. berghei</i><br>fusion antigen<br>Immunization | 1 <sup>st</sup> challenge<br>(16 weeks post antigen priming) |                                                      |                   |                      | Re-challenge of protected mice<br>(32 weeks post antigen priming) |                                                      |            |              |
|-----------------------------------------------------|--------------------------------------------------------------|------------------------------------------------------|-------------------|----------------------|-------------------------------------------------------------------|------------------------------------------------------|------------|--------------|
|                                                     | Number<br>infected/<br>challenged<br>mice                    | Parasitemia (%) <sup>a</sup><br>(day post challenge) |                   |                      | Number<br>infected/<br>challenged<br>mice                         | Parasitemia (%) <sup>a</sup><br>(day post challenge) |            |              |
|                                                     |                                                              | Day 7                                                | Day 9             | Day 12               |                                                                   | Day 7                                                | Day 9      | Day 12       |
| TRAP-N/<br>CSP-RT                                   | 0/5                                                          | 0                                                    | 0                 | 0                    | 0/5                                                               | 0                                                    | 0          | 0            |
| TRAP-N/<br>CSP-RT (dNG)                             | 0/5                                                          | 0                                                    | 0                 | 0                    | 0/5                                                               | 0                                                    | 0          | 0            |
| TRAP-N/<br>CSP-T                                    | 3/5                                                          | 3.5<br>2.9<br>2.3                                    | 3.8<br>4.7<br>3.9 | 8.4<br>10.4<br>8.5   | 2/2                                                               | 2.4<br>3.1                                           | 3.8<br>4.6 | 9.1<br>10.5  |
| TRAP-N/<br>CSP-T (dNG)                              | 3/5                                                          | 2.6<br>2.4<br>1.6                                    | 3.2<br>2.8<br>3.1 | 10.9<br>12.5<br>13.9 | 2/2                                                               | 2.7<br>2.9                                           | 3.2<br>3.7 | 13.9<br>12.6 |
| None (naïve)                                        | 1/1                                                          | 3.1                                                  | 8.0               | 18.9                 | 1/1                                                               | 2.3                                                  | 3.8        | 13.8         |

351 Mice were immunized in AddaVax adjuvant and challenged as described in the Methods. Blood  
 352 stage infection was monitored at days 7, 9 and 12 post each challenge. Mice free of blood  
 353 stage infection 12 days after challenge were determined as sterilely protected. Mice sterilely  
 354 protected from the 1<sup>st</sup> challenge were re-challenged 16 weeks after the 1<sup>st</sup> challenge.

355 <sup>a</sup> Data shown are individual infected mice; “0”, no infection of the entire group.

356 To evaluate maintenance of protection, sterilely protected mice were re-challenged 16  
357 weeks after the 1<sup>st</sup> challenge (32 weeks after antigen priming). Strikingly, the TRAP-N/CSP-RT  
358 and TRAP-N/CSP-RT (dNG) immunized groups were completely protected from re-challenge  
359 (Table I). In contrast, the 2 mice each immunized with TRAP-N/CSP-T and TRAP-N/CSP-T  
360 (dNG) antigens that were protected at week 16 were not protected at week 32 and showed  
361 blood stage infection (Table I).

362 These results show that immunization with TRAP-N/CSP-RT and its N-glycan shaved  
363 (dNG) version conferred sustained sterile protection, whereas TRAP-N/CSP-T and its dNG  
364 version, lacking the CSP repeat region, were less protective. Thus, the CSP repeat region  
365 enhanced protection, which correlated with higher antibody titers elicited by the TRAP-N/CSP-  
366 RT and TRAP-N/CSP-RT (dNG) fusion antigens (Fig 4A).

## 367 Discussion

368 The benefit of protection against malaria infection by co-immunization with CSP and  
369 TRAP was first demonstrated in 1991 by Khusmith *et al.*, who showed that immunization of mice  
370 with a mixture of *P. yoeli* CSP and TRAP-expressing cells provided complete protection,  
371 whereas immunization with either cell type alone only provided partial protection [36]. Despite  
372 this result, pre-erythrocytic vaccine development has focused on CSP and TRAP single subunit  
373 vaccines over the last two decades and clinical trials to date with CSP and TRAP subunit  
374 vaccines have achieved only partial protection. We show here that combining TRAP and CSP  
375 fragments into a single fusion protein that contained well-folded protein domains and regions  
376 with protective T- and B-cell epitopes from each fusion partner yielded a vaccine that stimulated  
377 sterilizing immunity.

378 The TRAP-N/CSP-RT fusion antigen containing from *Pb*TRAP the VWA and TSR  
379 domains and from *Pb*CSP the C-terminal half of the repeat region and the  $\alpha$ TSR domain  
380 conferred durable and complete sterile protection against *P. berghei* infection in BALB/c mice, a  
381 significant improvement over the 50% sterile protection obtained in BALB/c mice with three  
382 immunizations of adjuvanted full-length CSP protein [37]. By comparison, the *Pb*TRAP-N/CSP-  
383 T antigen that lacked the CSP repeat region was less protective (40% sterile protection),  
384 showing that the repeat region provided the enhanced protection, which correlated with higher  
385 antibody responses elicited by the TRAP-N/CSP-RT antigen. The same results on sterilizing  
386 immunity and antibody responses were obtained with chimeras containing high mannose or  
387 Endo H-shaved N-glycans. It is well known that the CSP repeats elicit strong sporozoite  
388 neutralizing antibody responses; several potent protective antibodies have been isolated and  
389 characterized [38-41]. On the other hand, TRAP delivered by viral vectors primarily stimulates  
390 CD8+ cytotoxic T cell responses that eliminate infected hepatocytes [11, 13, 42]. Further  
391 studies are required to understand how the VWA and TSR domains of TRAP and the repeats

392 and  $\alpha$ TSR domain of CSP additively or synergistically contribute to the sterile protection  
393 conferred by the TRAP-N/CSP-RT fusion antigen.

394 We expressed the TRAP-CSP fusion proteins in a mammalian system that allows proper  
395 disulfide formation and glycosylation. For protein-based subunit vaccines, proper folding of  
396 recombinant antigens to elicit antibody responses to native protein epitopes is important, and  
397 correct disulfide formation to stabilize antigen native conformation is critical. Many targets of  
398 malaria vaccine candidates, including TRAP and CSP, contain multiple disulfide bonds, which  
399 pose challenges to obtain antigens with correct disulfide formation from bacterial expression.  
400 Yeast and insect cell expression systems have achieved some success [35, 43, 44]. However,  
401 RTS,S is expressed in the yeast cytoplasm where disulfide bond formation is not promoted, and  
402 RTS has not been demonstrated to be monomeric or to have a natively folded CSP  $\alpha$ TSR  
403 domain [45-48]. We showed that mammalian expressed, purified *P. falciparum* TRAP-CSP  
404 fusion proteins are properly folded by demonstrating their reactivity to a panel of antibodies that  
405 recognize correctly folded VWA and TSR domains of *Pf*TRAP and the  $\alpha$ TSR domain of *Pf*CSP.  
406 We expect the purified monomeric *P. berghei* TRAP-CSP fusion proteins are properly folded  
407 likewise.

408 Importantly, mammalian cells mannosylate and fucosylate TSR domains similarly to  
409 *Plasmodium* sporozoites. X-ray crystallography and mass spectrometry have shown that the  
410 TSR domains of *Plasmodium* TRAP or its orthologue in *Toxoplasma gondii*, when expressed in  
411 mammalian cells, bear a C-linked mannose on tryptophan and O-linked fucose on threonine [18,  
412 49]. Both modifications are also found on TRAP on the surface of *P. falciparum* sporozoites [34].  
413 Furthermore, the  $\alpha$ TSR domain of CSP expressed in mammalian cells is fucosylated [22], as is  
414 the  $\alpha$ TSR domain of intact CSP on the surface of *P. falciparum* sporozoites [34]. Yeast lacks the  
415 gene required for fucosylation of TSR domains and the  $\alpha$ TSR domain expressed in *Pichia* was  
416 not fucosylated [22]. Fucosylation and mannosylation of TSR domains in Apicomplexans have

417 only recently been recognized [22] [18, 34, 49] and are little considered if at all in the malaria  
418 vaccine literature. However, these modifications may be of considerable importance in  
419 stabilizing folding and enhancing production of components of subunit vaccines and also may  
420 constitute important portions of both B cell folded antigenic epitopes and T cell peptide epitopes.

421 Less is known about N-glycosylation in *Plasmodium*. In contrast to N-glycans in yeast,  
422 insect and mammalian cells, *Plasmodium* makes severely truncated N-glycans composed of  
423 one or two N-acetylglucosamine (GlcNAc) residues [50]. Glycans can shield native epitopes  
424 from immune responses, as shown by the impact of the HIV-1-glycan shield on antibody  
425 elicitation [51, 52]. Efforts to overcome glycosylation differences between native and  
426 recombinant malarial antigens have been mostly restricted to mutations to remove putative N-  
427 glycosylation sites [43, 44]. We compared immune responses in mice to *P. berghei* TRAP-  
428 N/CSP-RT and TRAP-N/CSP-T fusion proteins with high mannose N-glycans to chimeras with  
429 all but one N-acetylglucosamine residue removed by Endo H (dNG). We found comparable  
430 antibody responses and no effect on protection in our *P. berghei* challenge model. Datta *et al*  
431 reported that N-glycosylation of the *Pfs25* antigen delivered as DNA vaccine did not significantly  
432 affect antibody response and malaria transmission blocking efficacy [53]. In contrast, un-  
433 glycosylated *P. falciparum* MSP1 antigen derived from transgenic mice and glycosylated high  
434 mannose MSP1 from baculovirus expression both protected monkeys from *P. falciparum*  
435 challenge, whereas glycosylated MSP1 antigen from mice conferred no protection [54]. These  
436 results suggest that the types of N-glycans, i.e. complex type with terminal sialic acids from  
437 mammalian cells vs. high mannose type from insect cells, contributed to the difference in  
438 protection. Therefore, the impact of N-glycosylation of malarial antigens on protection efficacy  
439 may vary both among antigens and the types of glycans.

440 Given the highly encouraging protection efficacy conferred by the *P. berghei* TRAP-  
441 N/CSP-RT fusion antigens in this study, TRAP-CSP chimeras offer promise as effective pre-  
442 erythrocytic vaccines and as fusion partners for multistage chimeric vaccines. Recently

443 identified potent protective and “dual specificity” antibodies to *Pf* CSP bind to the NANP repeats  
444 and the junction (J) region [32, 33]. This region has not been included in our *P. berghei*  
445 constructs or RTS,S. However, the *P. falciparum* chimeric construct containing this region,  
446 TRAP-N/CSP-JRT, was expressed even better than the TRAP-N/CSP-RT construct (Fig 1D). It  
447 would be very interesting to compare protection efficacy of TRAP-N/CSP-JRT with the TRAP-  
448 N/CSP-RT chimera in a *P. falciparum* challenge model. A chimeric antigen of *P. vivax* CSP and  
449 the transmission-blocking vaccine target s25 conferred 43% protection against parasite infection  
450 and 82% transmission blocking efficacy [55]. Recent crystal structures of HAP2, a gamete  
451 fusion protein that is also a transmission blocking target, offer further promise for rational design  
452 of TRAP-CSP-HAP2 fusion antigens with dual efficacy [56-59].

453 In conclusion, we have shown that TRAP-CSP fusion antigens could be highly effective  
454 vaccine candidates. Chimeric antigens provide a platform for development of multi-  
455 antigen/multi-stage vaccines to elicit dual immunity to prevent infection of humans and block  
456 transmission of infection by mosquitos using a single immunization regimen.

457 **Acknowledgments**

458 We thank Dr. Shahid Khan and Dr. Chris J. Janse (Leiden Malaria Research Group) for  
459 providing transgenic *Plasmodium berghei* lines.

## 460 References

- 461 1. Rts SCTP. Efficacy and safety of the RTS,S/AS01 malaria vaccine during 18 months after  
462 vaccination: a phase 3 randomized, controlled trial in children and young infants at 11  
463 African sites. *PLoS Med.* 2014 Jul;11(7):e1001685.
- 464 2. Rts SCTP. Efficacy and safety of RTS,S/AS01 malaria vaccine with or without a booster  
465 dose in infants and children in Africa: final results of a phase 3, individually randomised,  
466 controlled trial. *Lancet.* 2015 Jul 4;386(9988):31-45.
- 467 3. Epstein JE, Paolino KM, Richie TL, Sedegah M, Singer A, Ruben AJ, et al. Protection  
468 against *Plasmodium falciparum* malaria by PfSPZ Vaccine. *JCI Insight.* 2017 Jan  
469 12;2(1):e89154.
- 470 4. Butler NS, Vaughan AM, Harty JT, Kappe SH. Whole parasite vaccination approaches for  
471 prevention of malaria infection. *Trends Immunol.* 2012 May;33(5):247-54.
- 472 5. Seder RA, Chang LJ, Enama ME, Zephir KL, Sarwar UN, Gordon IJ, et al. Protection  
473 against malaria by intravenous immunization with a nonreplicating sporozoite vaccine.  
474 *Science.* 2013 Sep 20;341(6152):1359-65.
- 475 6. Mordmuller B, Surat G, Lagler H, Chakravarty S, Ishizuka AS, Lalremruata A, et al.  
476 Sterile protection against human malaria by chemoattenuated PfSPZ vaccine. *Nature.*  
477 2017 Feb 23;542(7642):445-9.
- 478 7. Sultan AA, Thathy V, Frevert U, Robson KJH, Crisanti A, Nussenzweig V, et al. TRAP is  
479 necessary for gliding motility and infectivity of *Plasmodium* sporozoites. *Cell.*  
480 1997;90(3):511-22.
- 481 8. Nussenzweig V, Nussenzweig RS. Circumsporozoite proteins of malaria parasites. *Cell.*  
482 1985;42(2):401-3.
- 483 9. Coppi A, Pinzon-Ortiz C, Hutter C, Sinnis P. The *Plasmodium* circumsporozoite protein is  
484 proteolytically processed during cell invasion. *J Exp Med.* 2005 Jan 3;201(1):27-33.
- 485 10. Coppi A, Natarajan R, Pradel G, Bennett BL, James ER, Roggero MA, et al. The malaria  
486 circumsporozoite protein has two functional domains, each with distinct roles as  
487 sporozoites journey from mosquito to mammalian host. *J Exp Med.* 2011 Feb  
488 14;208(2):341-56.
- 489 11. Reyes-Sandoval A, Berthoud T, Alder N, Siani L, Gilbert SC, Nicosia A, et al. Prime-boost  
490 immunization with adenoviral and modified vaccinia virus Ankara vectors enhances the  
491 durability and polyfunctionality of protective malaria CD8+ T-cell responses. *Infect*  
492 *Immun.* 2010 Jan;78(1):145-53.
- 493 12. Bauza K, Atcheson E, Malinauskas T, Blagborough AM, Reyes-Sandoval A. Tailoring a  
494 Combination Preerythrocytic Malaria Vaccine. *Infect Immun.* 2015 Dec 14;84(3):622-34.



- 495 13. Ewer KJ, O'Hara GA, Duncan CJ, Collins KA, Sheehy SH, Reyes-Sandoval A, et al.  
496 Protective CD8+ T-cell immunity to human malaria induced by chimpanzee adenovirus-  
497 MVA immunisation. *Nature communications*. 2013;4:2836.
- 498 14. Ogwang C, Kimani D, Edwards NJ, Roberts R, Mwacharo J, Bowyer G, et al. Prime-boost  
499 vaccination with chimpanzee adenovirus and modified vaccinia Ankara encoding TRAP  
500 provides partial protection against *Plasmodium falciparum* infection in Kenyan adults. *Sci*  
501 *Transl Med*. 2015 May 6;7(286):286re5.
- 502 15. Kester KE, Gray Heppner D, Jr., Moris P, Ofori-Anyinam O, Krzych U, Tornieporth N, et  
503 al. Sequential Phase 1 and Phase 2 randomized, controlled trials of the safety,  
504 immunogenicity and efficacy of combined pre-erythrocytic vaccine antigens RTS,S and  
505 TRAP formulated with AS02 Adjuvant System in healthy, malaria naive adults. *Vaccine*.  
506 2014 Nov 20;32(49):6683-91.
- 507 16. Collins KA, Snaith R, Cottingham MG, Gilbert SC, Hill AVS. Enhancing protective  
508 immunity to malaria with a highly immunogenic virus-like particle vaccine. *Sci Rep*. 2017  
509 Apr 19;7:46621.
- 510 17. Forbes EK, Biswas S, Collins KA, Gilbert SC, Hill AV, Draper SJ. Combining liver- and  
511 blood-stage malaria viral-vectored vaccines: investigating mechanisms of CD8+ T cell  
512 interference. *J Immunol*. 2011 Oct 1;187(7):3738-50.
- 513 18. Song G, Koksai AC, Lu C, Springer TA. Shape change in the receptor for gliding motility  
514 in *plasmodium* sporozoites. *Proc Natl Acad Sci U S A*. 2012 December  
515 26;109(52):21420-5.
- 516 19. Reeves PJ, Callewaert N, Contreras R, Khorana HG. Structure and function in rhodopsin:  
517 high-level expression of rhodopsin with restricted and homogeneous N-glycosylation by a  
518 tetracycline-inducible N-acetylglucosaminyltransferase I-negative HEK293S stable  
519 mammalian cell line. *Proc Natl Acad Sci U S A*. 2002 Oct 15;99(21):13419-24.
- 520 20. Zhou YF, Springer TA. Highly reinforced structure of a C-terminal dimerization domain in  
521 von Willebrand factor. *Blood*. 2014 Mar 20;123(12):1785-93.
- 522 21. Franke-Fayard B, Trueman H, Ramesar J, Mendoza J, van der Keur M, van der Linden  
523 R, et al. A *Plasmodium berghei* reference line that constitutively expresses GFP at a high  
524 level throughout the complete life cycle. *Mol Biochem Parasitol*. 2004 Sep;137(1):23-33.
- 525 22. Doud MB, Koksai AC, Mi LZ, Song G, Lu C, Springer TA. An unexpected fold in the  
526 circumsporozoite protein target of malaria vaccines. *Proc Natl Acad Sci U S A*.  
527 2012;109(20):7817-22.
- 528 23. Wengelnik K, Spaccapelo R, Naitza S, Robson KJ, Janse CJ, Bistoni F, et al. The A-  
529 domain and the thrombospondin-related motif of *Plasmodium falciparum* TRAP are  
530 implicated in the invasion process of mosquito salivary glands. *EMBO J*. 1999 Oct  
531 1;18(19):5195-204.
- 532 24. Bauza K, Malinauskas T, Pfander C, Anar B, Jones EY, Billker O, et al. Efficacy of a  
533 *Plasmodium vivax* malaria vaccine using ChAd63 and modified vaccinia Ankara

- 534 expressing thrombospondin-related anonymous protein as assessed with transgenic  
535 *Plasmodium berghei* parasites. *Infect Immun*. 2014 Mar;82(3):1277-86.
- 536 25. Hafalla JC, Bauza K, Friesen J, Gonzalez-Aseguinolaza G, Hill AV, Matuschewski K.  
537 Identification of targets of CD8(+) T cell responses to malaria liver stages by genome-  
538 wide epitope profiling. *PLoS Pathog*. 2013 May;9(5):e1003303.
- 539 26. Doll KL, Pewe LL, Kurup SP, Harty JT. Discriminating Protective from Nonprotective  
540 *Plasmodium*-Specific CD8+ T Cell Responses. *J Immunol*. 2016 May 15;196(10):4253-  
541 62.
- 542 27. Cohen J, Nussenzweig V, Nussenzweig R, Vekemans J, Leach A. From the  
543 circumsporozoite protein to the RTS, S/AS candidate vaccine. *Hum Vaccin*. 2010  
544 Jan;6(1):90-6.
- 545 28. Dups JN, Pepper M, Cockburn IA. Antibody and B cell responses to *Plasmodium*  
546 sporozoites. *Front Microbiol*. 2014;5:625.
- 547 29. Reece WH, Pinder M, Gothard PK, Milligan P, Bojang K, Doherty T, et al. A CD4(+) T-cell  
548 immune response to a conserved epitope in the circumsporozoite protein correlates with  
549 protection from natural *Plasmodium falciparum* infection and disease. *Nat Med*. 2004  
550 Apr;10(4):406-10.
- 551 30. Kumar KA, Sano G, Boscardin S, Nussenzweig RS, Nussenzweig MC, Zavala F, et al.  
552 The circumsporozoite protein is an immunodominant protective antigen in irradiated  
553 sporozoites. *Nature*. 2006;444(7121):937-40.
- 554 31. Espinosa DA, Gutierrez GM, Rojas-Lopez M, Noe AR, Shi L, Tse SW, et al. Proteolytic  
555 Cleavage of the *Plasmodium falciparum* Circumsporozoite Protein Is a Target of  
556 Protective Antibodies. *J Infect Dis*. 2015 Oct 1;212(7):1111-9.
- 557 32. Tan J, Sack BK, Oyen D, Zenklusen I, Piccoli L, Barbieri S, et al. A public antibody  
558 lineage that potently inhibits malaria infection through dual binding to the  
559 circumsporozoite protein. *Nat Med*. 2018 May;24(4):401-7.
- 560 33. Kisalu NK, Idris AH, Weidle C, Flores-Garcia Y, Flynn BJ, Sack BK, et al. A human  
561 monoclonal antibody prevents malaria infection by targeting a new site of vulnerability on  
562 the parasite. *Nat Med*. 2018 May;24(4):408-16.
- 563 34. Swearingen KE, Lindner SE, Shi L, Shears MJ, Harupa A, Hopp CS, et al. Interrogating  
564 the *Plasmodium* Sporozoite Surface: Identification of Surface-Exposed Proteins and  
565 Demonstration of Glycosylation on CSP and TRAP by Mass Spectrometry-Based  
566 Proteomics. *PLoS Pathog*. 2016 Apr 29;12(4):e1005606.
- 567 35. Plassmeyer ML, Reiter K, Shimp RL, Jr., Kotova S, Smith PD, Hurt DE, et al. Structure of  
568 the *Plasmodium falciparum* circumsporozoite protein, a leading malaria vaccine  
569 candidate. *J Biol Chem*. 2009 Sep 25;284(39):26951-63.
- 570 36. Khusmith S, Charoenvit Y, Kumar S, Sedegah M, Beaudoin RL, Hoffman SL. Protection  
571 against malaria by vaccination with sporozoite surface protein 2 plus CS protein. *Science*.  
572 1991 May 3;252(5006):715-8.

- 573 37. Noe AR, Espinosa D, Li X, Coelho-Dos-Reis JG, Funakoshi R, Giardina S, et al. A full-  
574 length Plasmodium falciparum recombinant circumsporozoite protein expressed by  
575 Pseudomonas fluorescens platform as a malaria vaccine candidate. PLoS One.  
576 2014;9(9):e107764.
- 577 38. Oyen D, Torres JL, Wille-Reece U, Ockenhouse CF, Emerling D, Glanville J, et al.  
578 Structural basis for antibody recognition of the NANP repeats in Plasmodium falciparum  
579 circumsporozoite protein. Proc Natl Acad Sci U S A. 2017 Nov 28;114(48):E10438-E45.
- 580 39. Triller G, Scally SW, Costa G, Pissarev M, Kreschel C, Bosch A, et al. Natural Parasite  
581 Exposure Induces Protective Human Anti-Malarial Antibodies. Immunity. 2017 Dec  
582 19;47(6):1197-209 e10.
- 583 40. Fisher CR, Sutton HJ, Kaczmarek JA, McNamara HA, Clifton B, Mitchell J, et al. T-  
584 dependent B cell responses to Plasmodium induce antibodies that form a high-avidity  
585 multivalent complex with the circumsporozoite protein. PLoS Pathog. 2017  
586 Jul;13(7):e1006469.
- 587 41. Imkeller K, Scally SW, Bosch A, Marti GP, Costa G, Triller G, et al. Antihomotypic affinity  
588 maturation improves human B cell responses against a repetitive epitope. Science. 2018  
589 Jun 22;360(6395):1358-62.
- 590 42. Schneider J, Gilbert SC, Blanchard TJ, Hanke T, Robson KJ, Hannan CM, et al.  
591 Enhanced immunogenicity for CD8+ T cell induction and complete protective efficacy of  
592 malaria DNA vaccination by boosting with modified vaccinia virus Ankara. Nat Med. 1998  
593 Apr;4(4):397-402.
- 594 43. Lee SM, Wu CK, Plieskatt J, McAdams DH, Miura K, Ockenhouse C, et al. Assessment  
595 of Pfs25 expressed from multiple soluble expression platforms for use as transmission-  
596 blocking vaccine candidates. Malar J. 2016 Aug 11;15(1):405.
- 597 44. Hjerrild KA, Jin J, Wright KE, Brown RE, Marshall JM, Labbe GM, et al. Production of full-  
598 length soluble Plasmodium falciparum RH5 protein vaccine using a Drosophila  
599 melanogaster Schneider 2 stable cell line system. Sci Rep. 2016 Jul 26;6:30357.
- 600 45. Rutgers T, Gordon D, Gathoye AM, Hollingdale M, Hockmeyer W, Rosenberg M, et al.  
601 Hepatitis B Surface Antigen as Carrier Matrix for the Repetitive Epitope of the  
602 Circumsporozoite Protein of Plasmodium Falciparum. Biotechnology (N Y). 1988  
603 09/01/online;6:1065.
- 604 46. Jacobs E, Rutgers T, Voet P, Dewerchin M, Cabezon T, de Wilde M. Simultaneous  
605 synthesis and assembly of various hepatitis B surface proteins in Saccharomyces  
606 cerevisiae. Gene. 1989 Aug 15;80(2):279-91.
- 607 47. Gordon DM, McGovern TW, Krzych U, Cohen JC, Schneider I, LaChance R, et al. Safety,  
608 immunogenicity, and efficacy of a recombinantly produced Plasmodium falciparum  
609 circumsporozoite protein-hepatitis B surface antigen subunit vaccine. J Infect Dis. 1995  
610 Jun;171(6):1576-85.
- 611 48. Heppner DG, Jr., Kester KE, Ockenhouse CF, Tornieporth N, Ofori O, Lyon JA, et al.  
612 Towards an RTS,S-based, multi-stage, multi-antigen vaccine against falciparum malaria:

- 613 progress at the Walter Reed Army Institute of Research. *Vaccine*. 2005 Mar 18;23(17-  
614 18):2243-50.
- 615 49. Song G, Springer TA. Structures of the *Toxoplasma* gliding motility adhesin. *Proc Natl*  
616 *Acad Sci U S A*. 2014 Mar 17;111:4862-7.
- 617 50. Bushkin GG, Ratner DM, Cui J, Banerjee S, Duraisingh MT, Jennings CV, et al.  
618 Suggestive evidence for Darwinian Selection against asparagine-linked glycans of  
619 *Plasmodium falciparum* and *Toxoplasma gondii*. *Eukaryot Cell*. 2010 Feb;9(2):228-41.
- 620 51. Zhou T, Doria-Rose NA, Cheng C, Stewart-Jones GBE, Chuang GY, Chambers M, et al.  
621 Quantification of the Impact of the HIV-1-Glycan Shield on Antibody Elicitation. *Cell*  
622 *reports*. 2017 Apr 25;19(4):719-32.
- 623 52. Dubrovskaya V, Guenaga J, de Val N, Wilson R, Feng Y, Movsesyan A, et al. Targeted  
624 N-glycan deletion at the receptor-binding site retains HIV Env NFL trimer integrity and  
625 accelerates the elicited antibody response. *PLoS Pathog*. 2017 Sep;13(9):e1006614.
- 626 53. Datta D, Bansal GP, Kumar R, Ellefsen B, Hannaman D, Kumar N. Evaluation of the  
627 Impact of Codon Optimization and N-Linked Glycosylation on Functional Immunogenicity  
628 of Pfs25 DNA Vaccines Delivered by In Vivo Electroporation in Preclinical Studies in  
629 Mice. *Clin Vaccine Immunol*. 2015 Sep;22(9):1013-9.
- 630 54. Stowers AW, Chen Lh LH, Zhang Y, Kennedy MC, Zou L, Lambert L, et al. A  
631 recombinant vaccine expressed in the milk of transgenic mice protects Aotus monkeys  
632 from a lethal challenge with *Plasmodium falciparum*. *Proc Natl Acad Sci U S A*. 2002 Jan  
633 8;99(1):339-44.
- 634 55. Mizutani M, Iyori M, Blagborough AM, Fukumoto S, Funatsu T, Sinden RE, et al.  
635 Baculovirus-vectored multistage *Plasmodium vivax* vaccine induces both protective and  
636 transmission-blocking immunities against transgenic rodent malaria parasites. *Infect*  
637 *Immun*. 2014 Oct;82(10):4348-57.
- 638 56. Feng J, Dong X, Pinello J, Zhang J, Lu C, Jacob RE, et al. Fusion surface structure,  
639 function, and dynamics of gamete fusogen HAP2. *eLife*. 2018 Oct 3;7.
- 640 57. Fedry J, Forcina J, Legrand P, Pehau-Arnaudet G, Haouz A, Johnson M, et al.  
641 Evolutionary diversification of the HAP2 membrane insertion motifs to drive gamete  
642 fusion across eukaryotes. *PLoS Biol*. 2018 Aug;16(8):e2006357.
- 643 58. Angrisano F, Sala KA, Da DF, Liu Y, Pei J, Grishin NV, et al. Targeting the Conserved  
644 Fusion Loop of HAP2 Inhibits the Transmission of *Plasmodium berghei* and *falciparum*.  
645 *Cell reports*. 2017 Dec 5;21(10):2868-78.
- 646 59. Fedry J, Liu Y, Pehau-Arnaudet G, Pei J, Li W, Tortorici MA, et al. The Ancient Gamete  
647 Fusogen HAP2 Is a Eukaryotic Class II Fusion Protein. *Cell*. 2017 Feb 23;168(5):904-15  
648 e10.

## 649 **Supporting information**

650 S1 Text. Methods for generation and characterization of monoclonal antibodies to *P.*

651 *falciparum* TRAP

652 S2 Text. Supplemental figure legends.

653 S3 Fig s1. Antibody epitope mapping.

654 S4 Fig s2. Flow cytometry analysis of antibody binding to TRAP transfectants.

655 S5 Fig s3. Antibody staining of sporozoites.

656 S6 Fig s4. Antibody competition.

657 S7 Fig s5. Effect of antigen disulfide reduction on antibody reactivity.

658 S8 Table s1. Summary of antibodies to *P. falciparum* TRAP



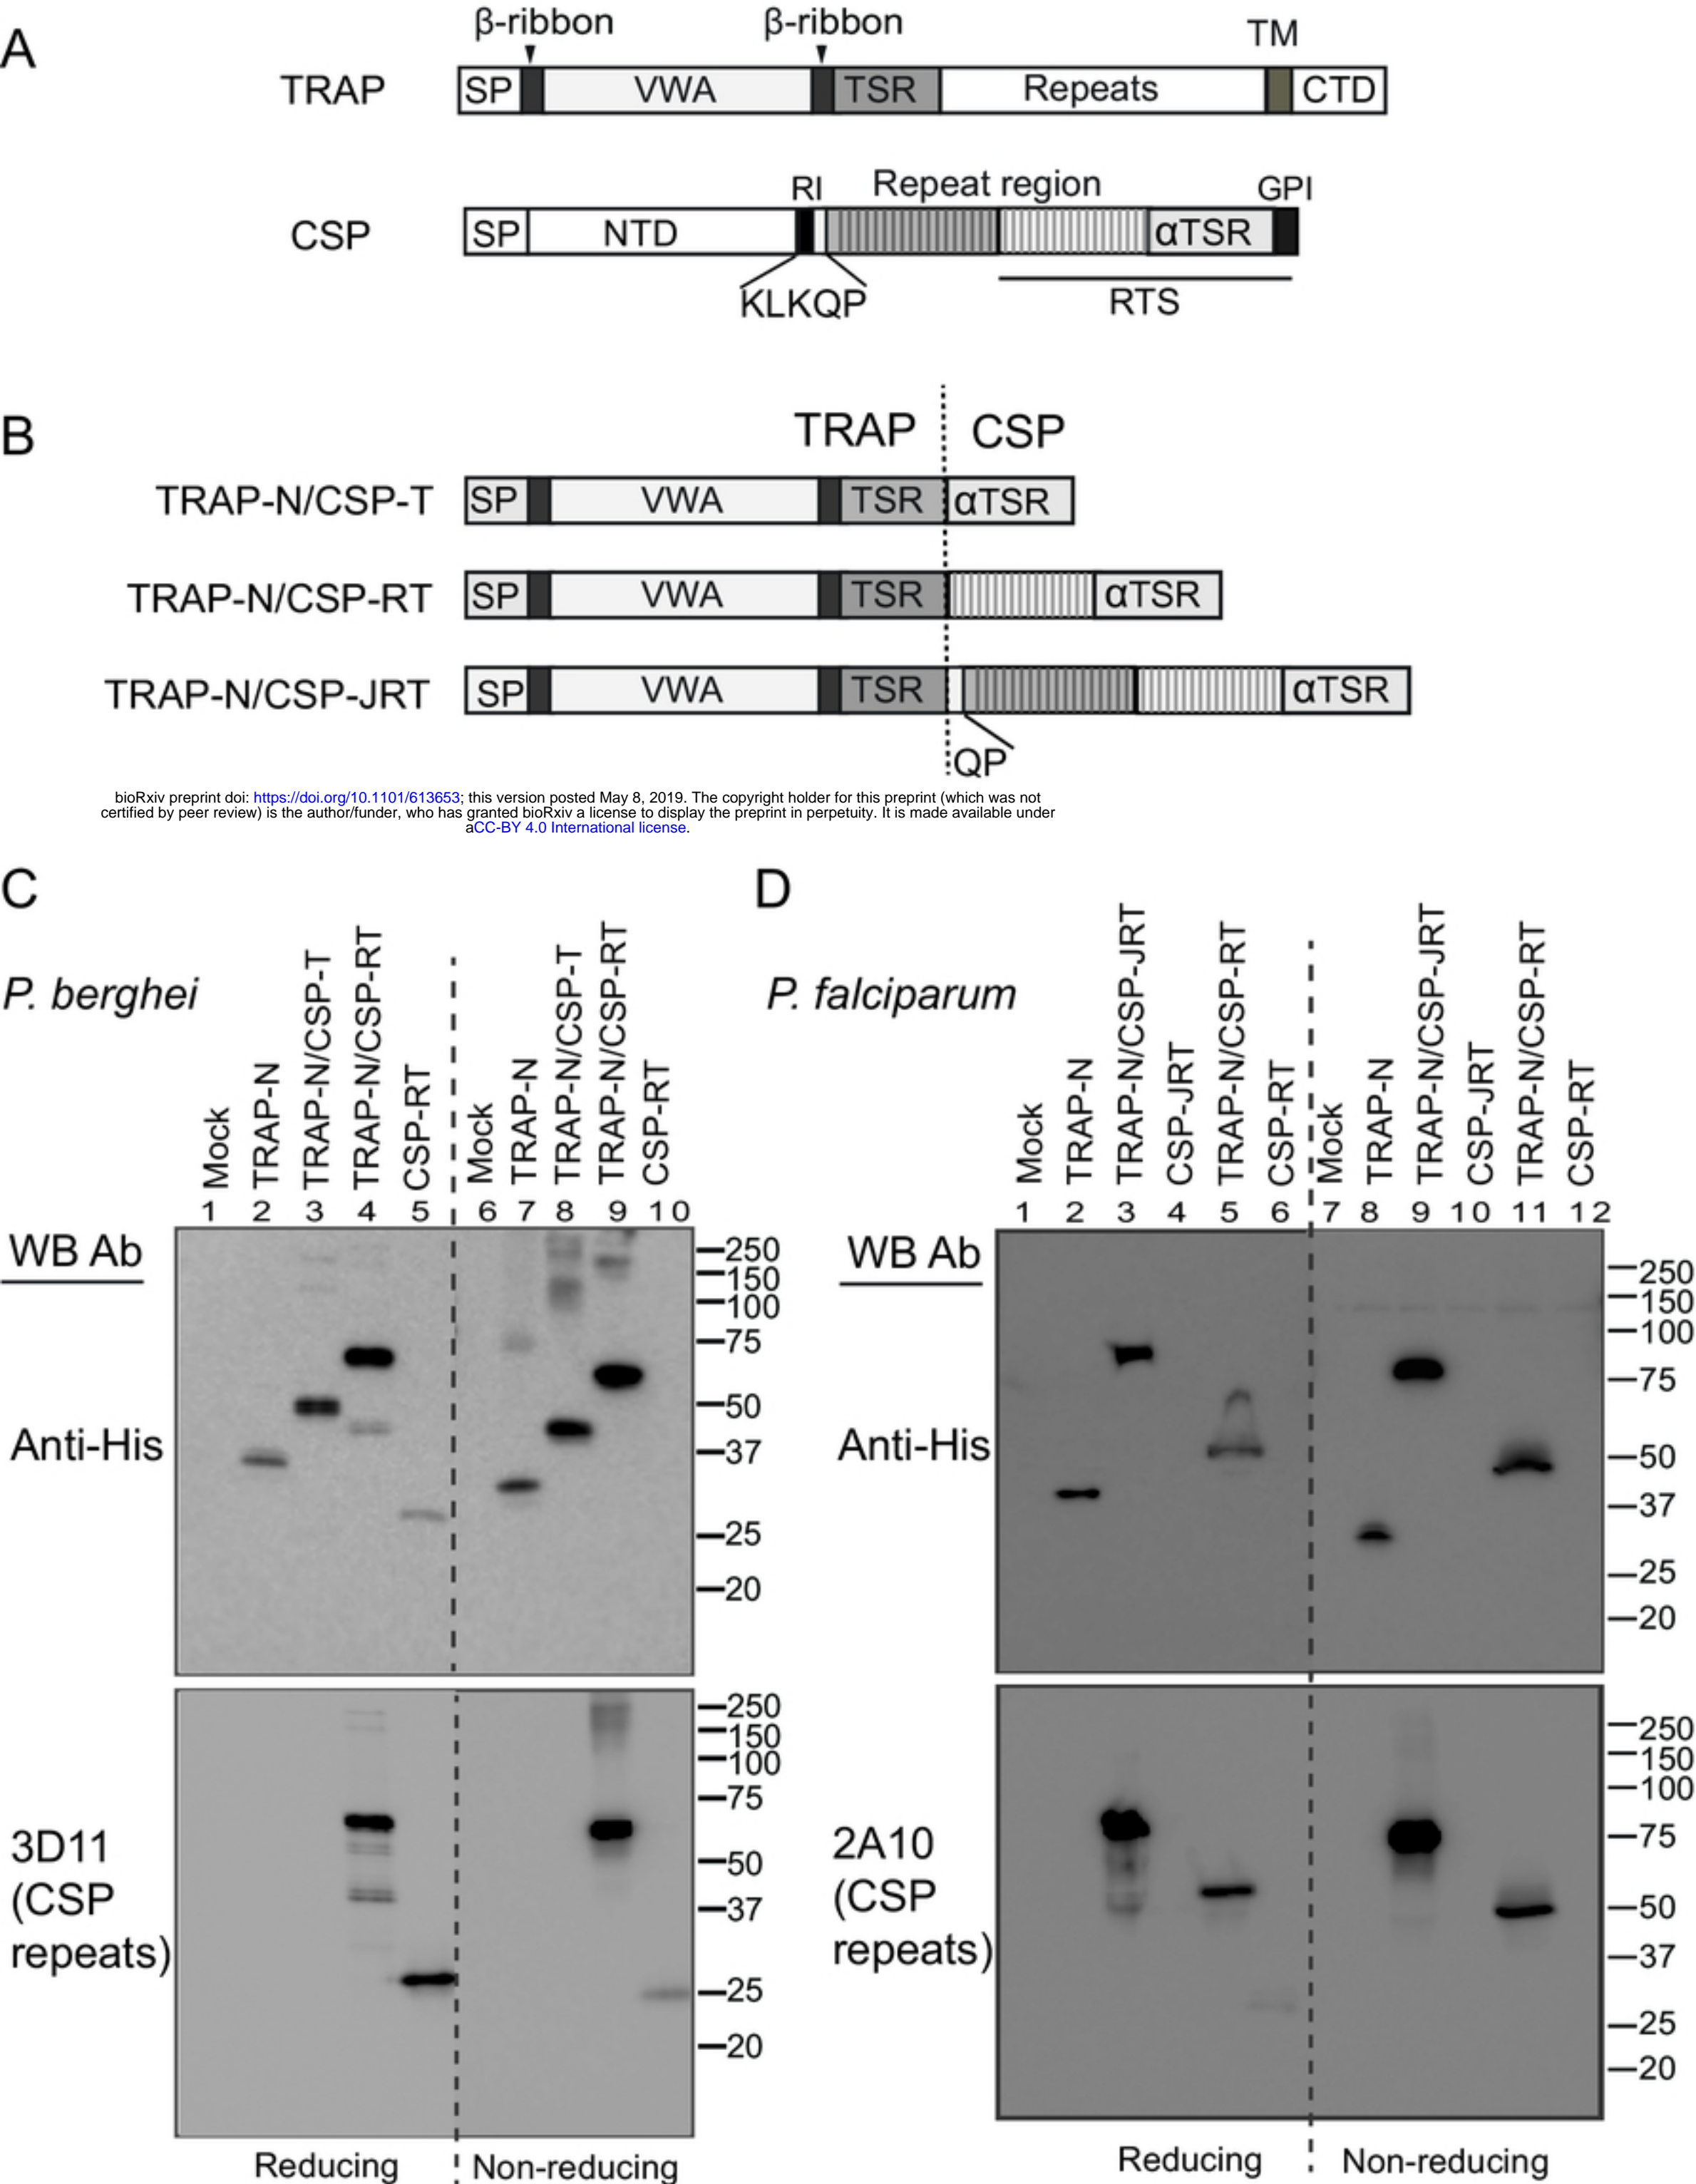

Figure 1

**A**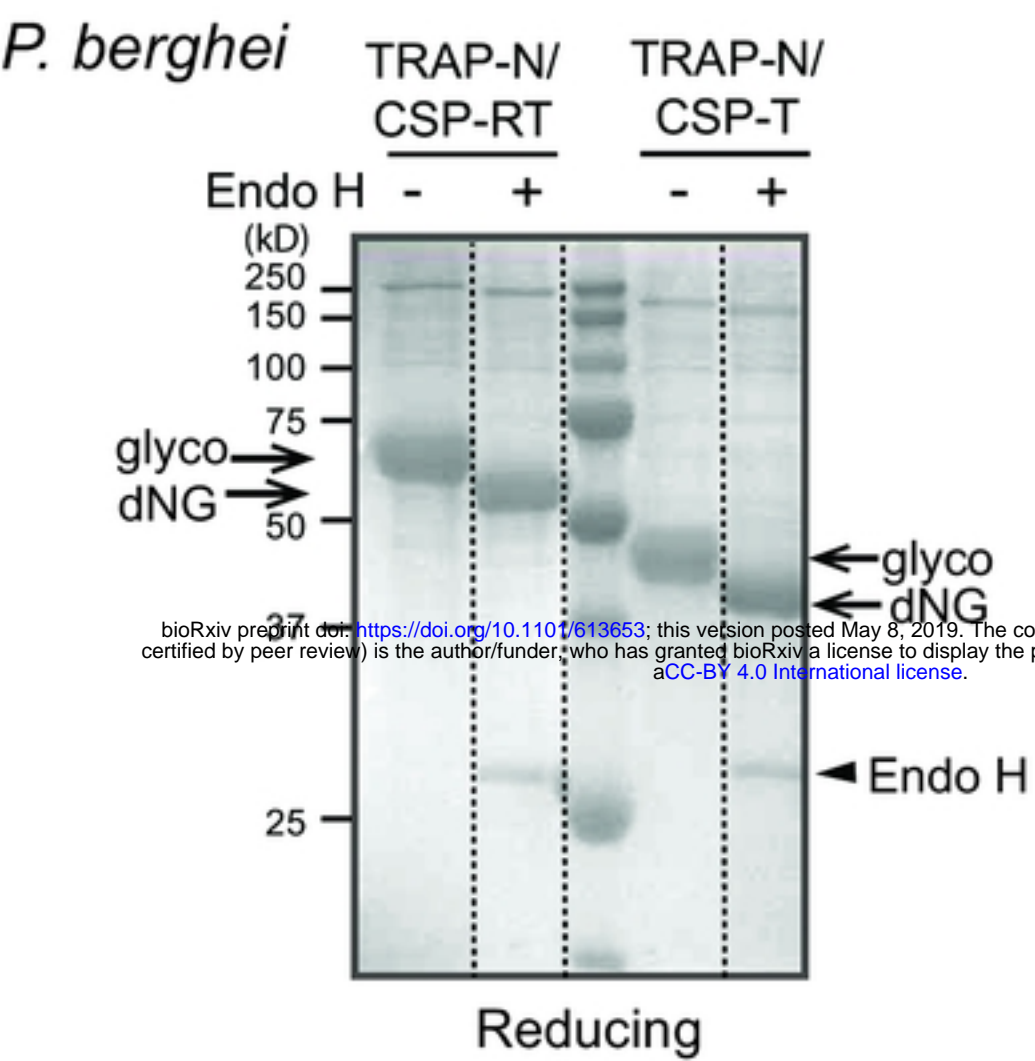**B**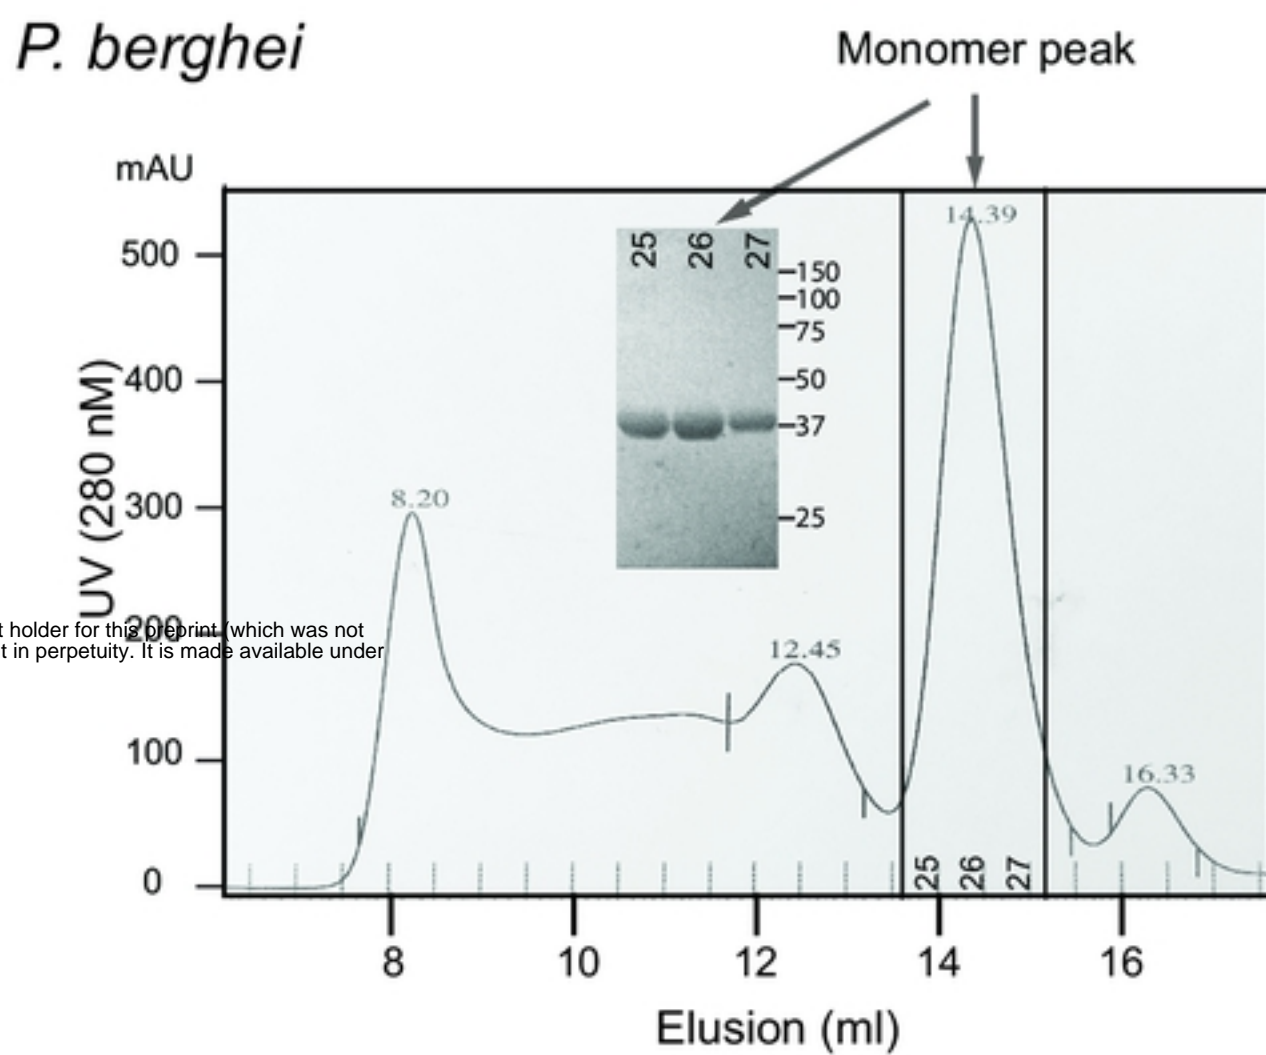**C***P. berghei*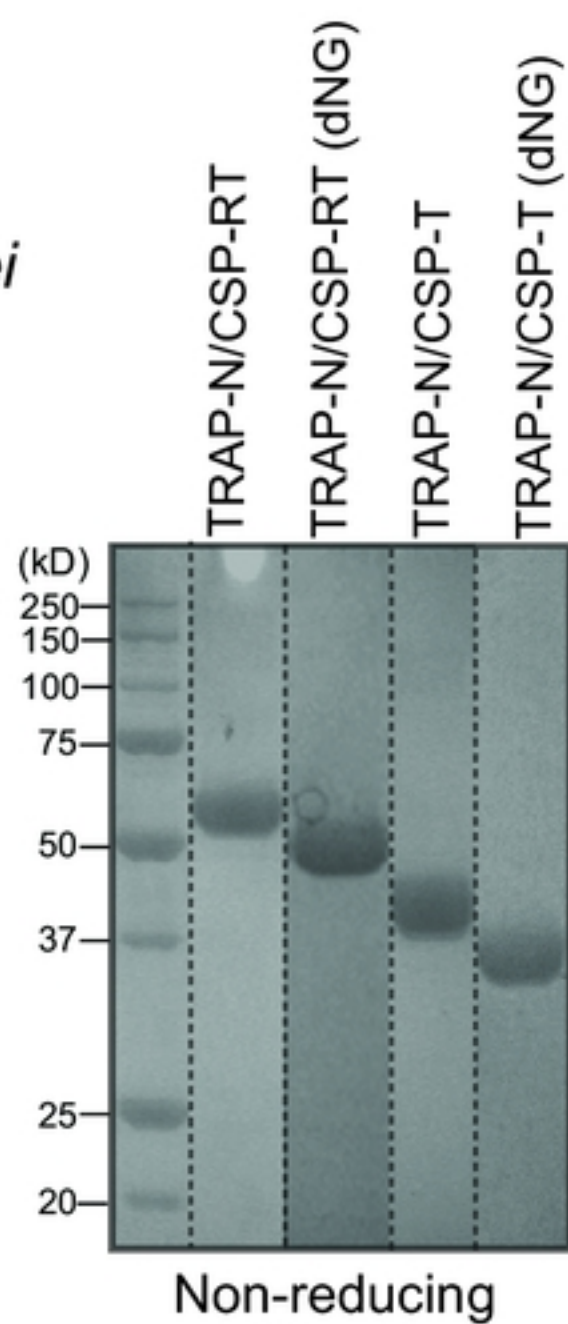**D***P. falciparum*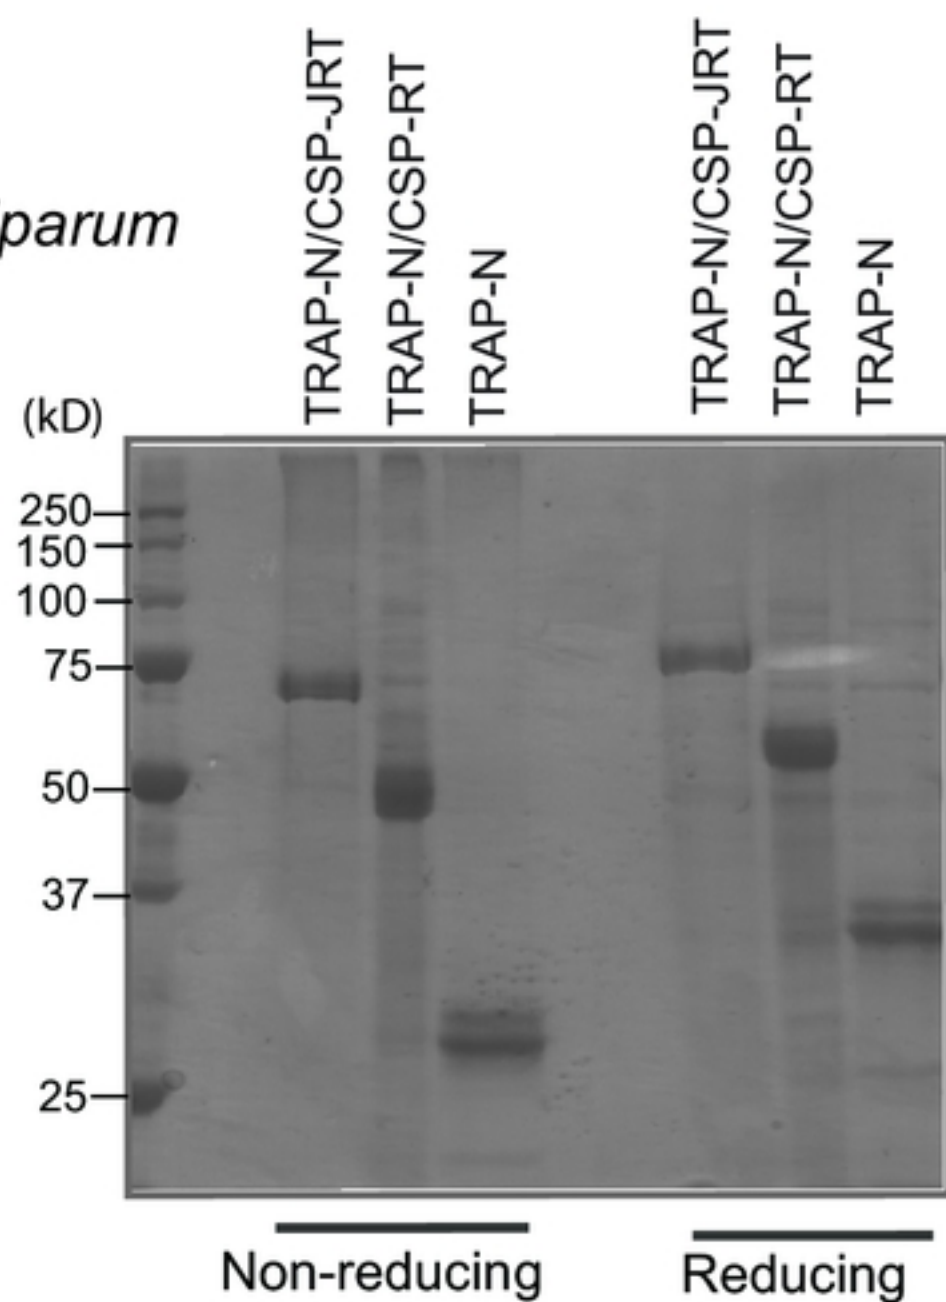

Figure 2

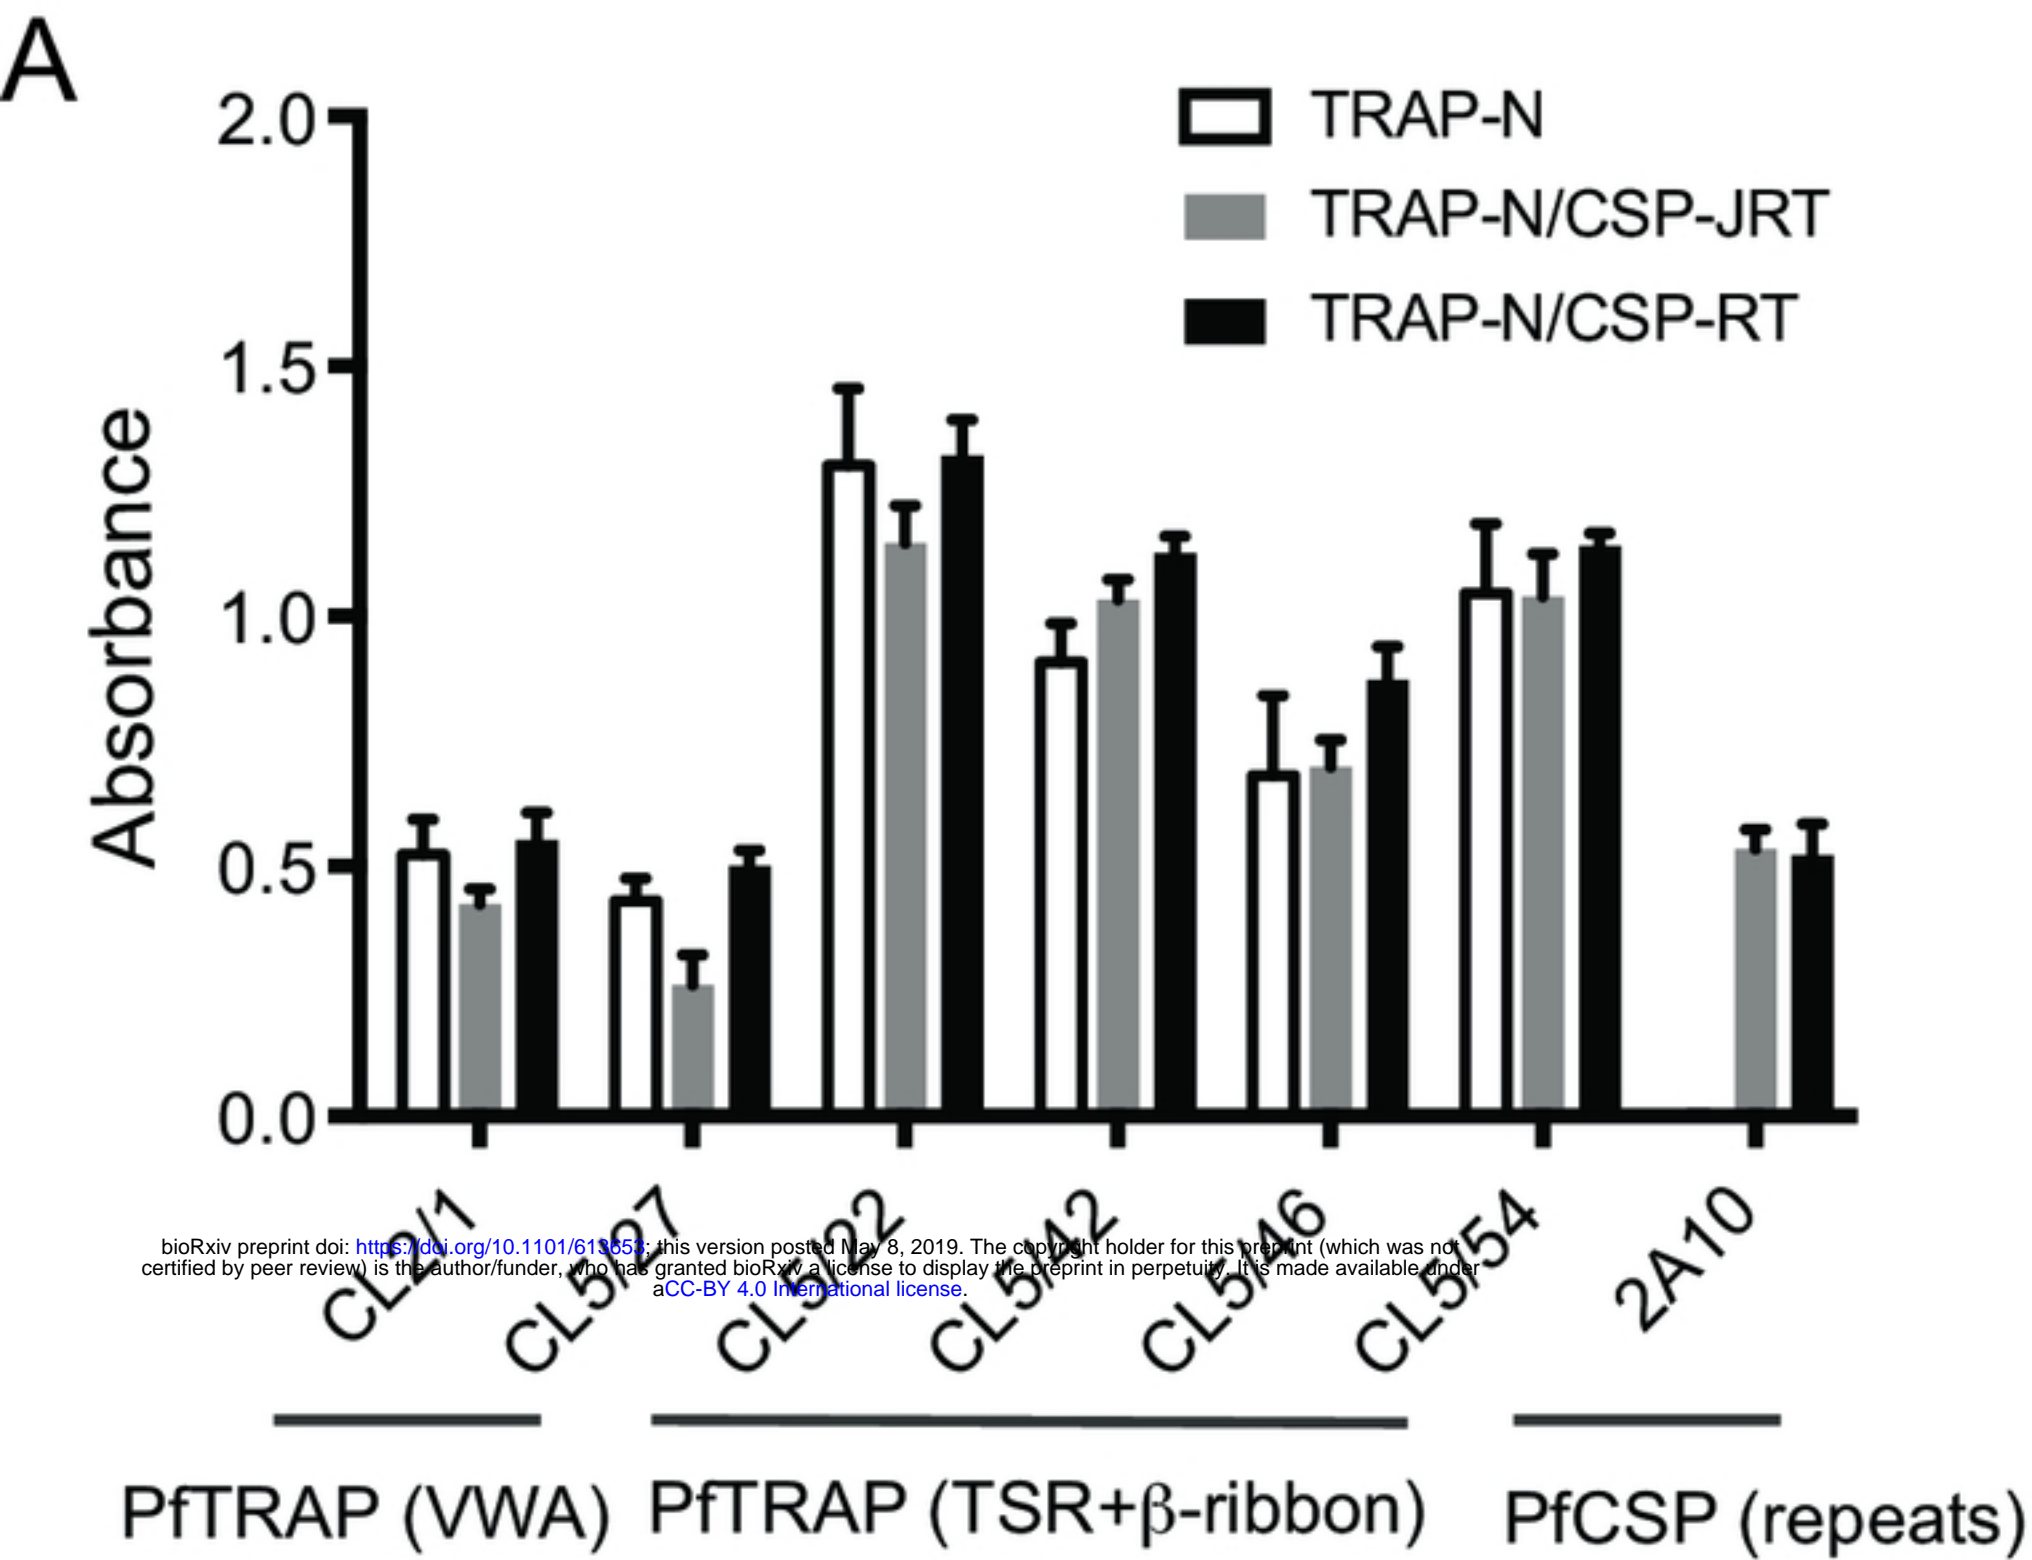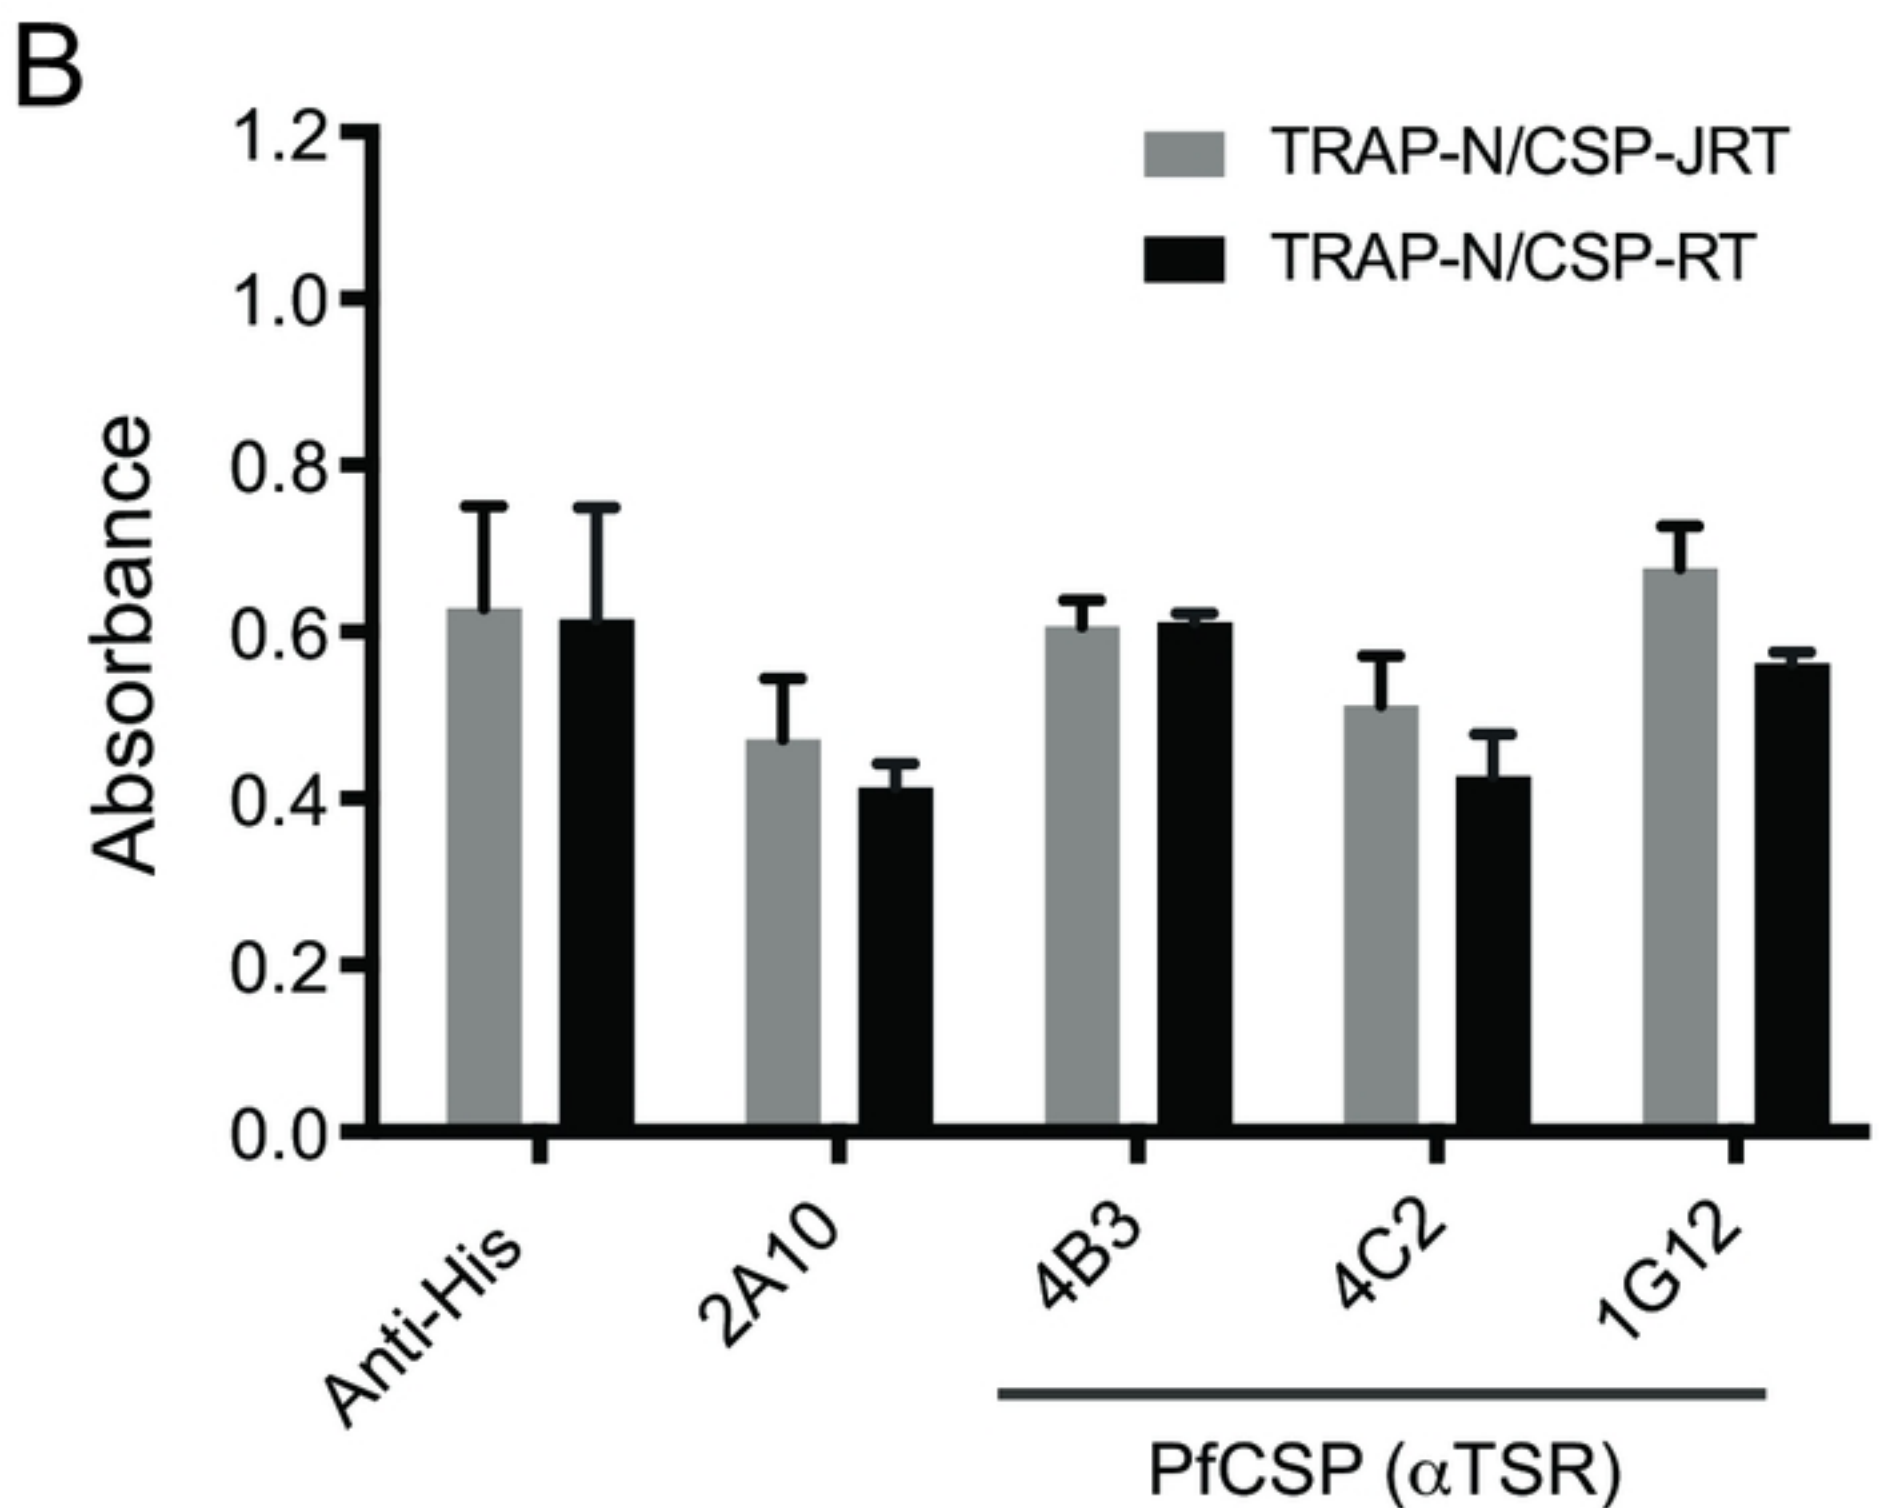

Figure 3



**Fig 4****A**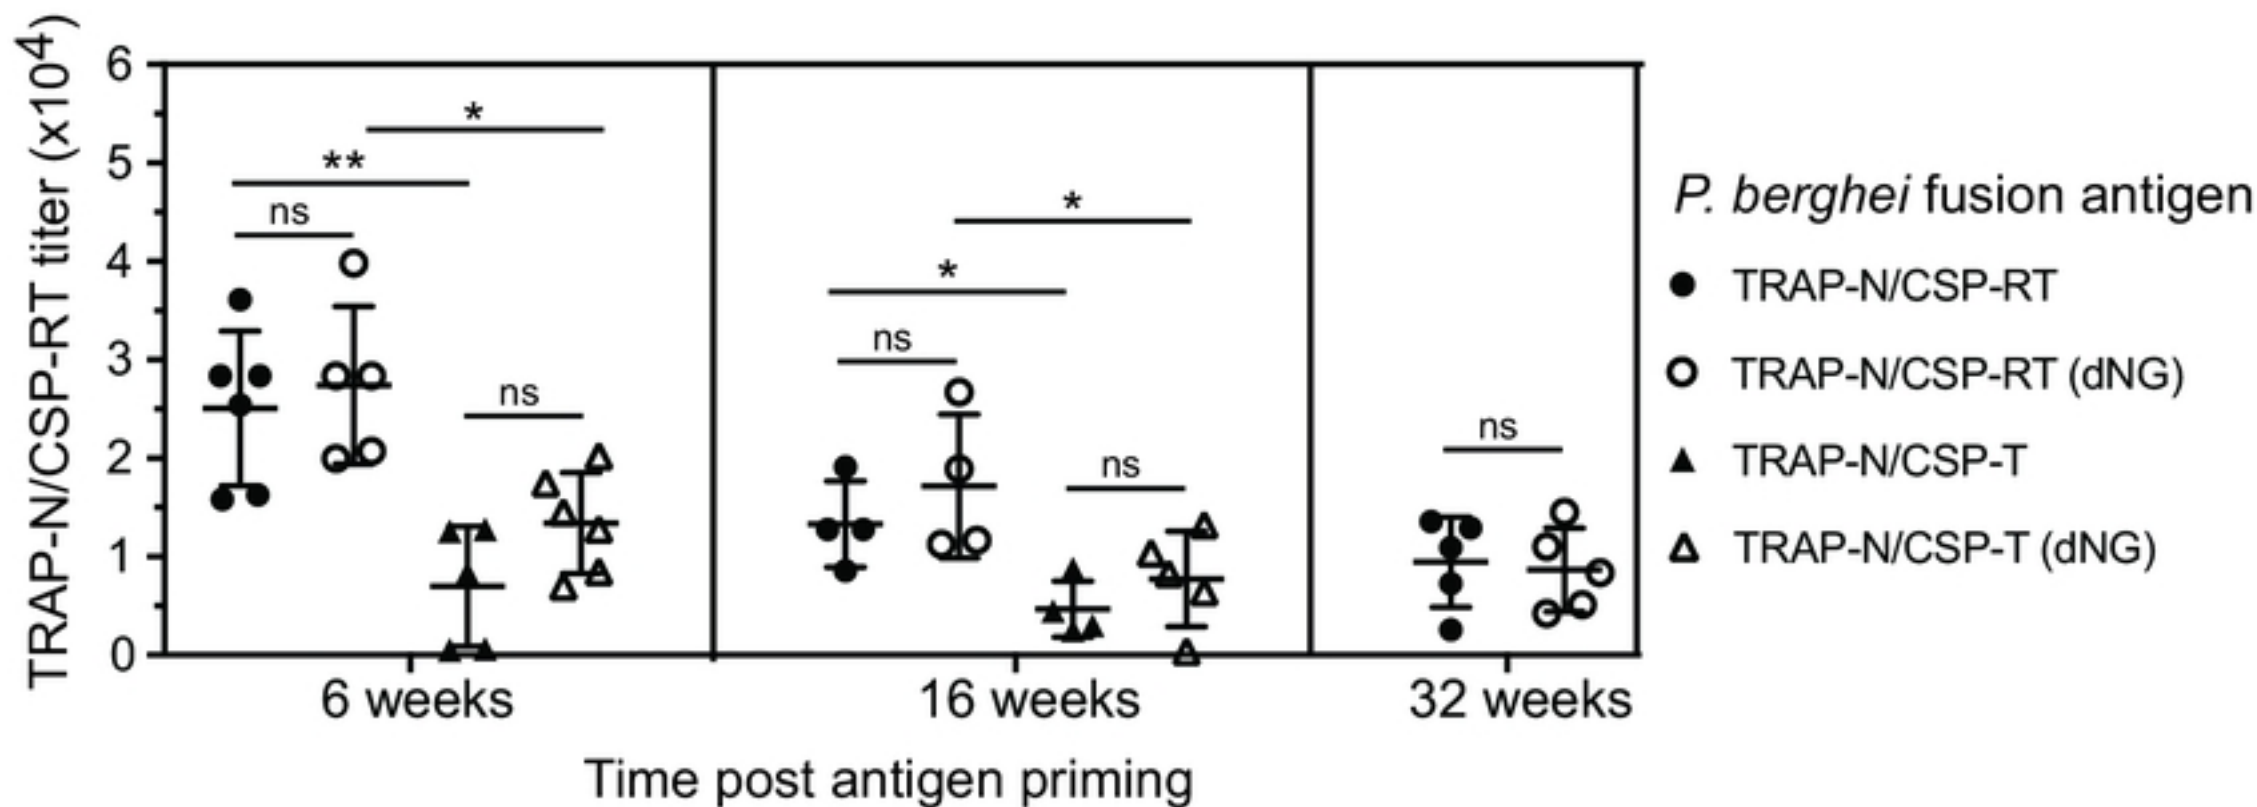**B**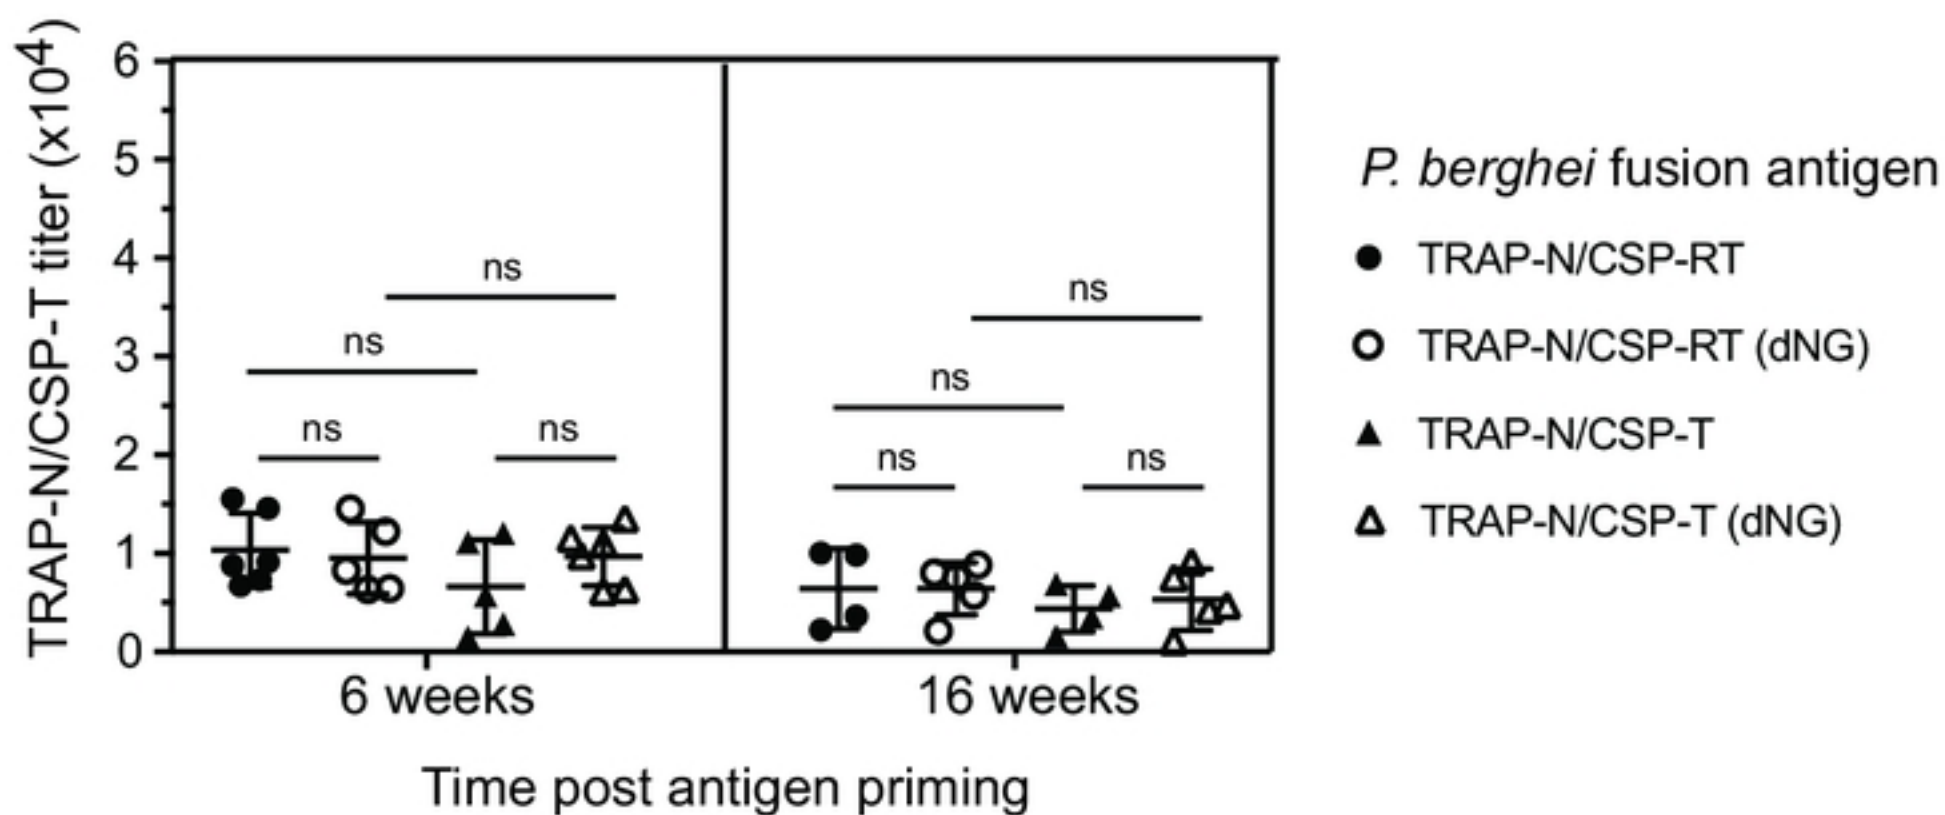**Figure 4**
